# Supplementary material
Source: publisher site journal article supplement (https://www.spandidos-publications.com/6948/downloadSupplementary)
Supplement: Supplementary file 1 [file downloadSupplementary]

## Sheet: DEGs-Results
Table SIV. Differential anoikis genes related results.
Differential anoikis genes	logFC	Average expression	t	P-value	Adjusted P-value	B	Significance
HGF	-2.17463	3.42708	-8.21946	1.7x10-13	3.6x10-10	20.2305	down
ITGA4	-0.742615	5.66473	-6.58787	9.9x10-10	2.1x10-7	11.8322	down
STK26	-0.865613	5.32346	-9.55025	1.0x10-16	4.0x10-12	27.4956	down
SCML2P2	-1.31643	2.62295	-9.10881	1.2x10-15	1.3x10-11	25.0587	down
LINC02175	-1.15362	2.13864	-9.03617	1.8x10-15	1.4x10-11	24.66	down
TPP2	-0.555159	4.70363	-8.86019	5.0x10-15	3.2x10-11	23.6967	down
MED21	-0.687819	3.89997	-8.7145	1.1x10-14	5.5x10-11	22.9025	down
DENND11	-0.929911	4.15145	-8.68936	1.3x10-14	5.7x10-11	22.7658	down
MIB1	-0.743174	3.78222	-8.62029	1.9x10-14	7.5x10-11	22.3908	down
CDK6	-1.12008	5.96552	-8.32574	9.7x10-14	2.1x10-10	20.8004	down
SORL1	-1.17263	4.77875	-8.16616	2.3x10-13	4.4x10-10	19.9455	down
CEP170	-0.586359	3.36323	-8.05603	4.3x10-13	6.7x10-10	19.3584	down
PCM1	-0.532183	4.40372	-7.89191	1.0x10-12	1.4x10-9	18.4885	down
FNDC3A	-0.566315	4.20996	-7.76535	2.0x10-12	2.4x10-9	17.8219	down
MBTD1	-0.579609	3.8582	-7.73253	2.4x10-12	2.6x10-9	17.6496	down
ARFGEF1	-0.580465	4.17452	-7.72774	2.5x10-12	2.6x10-9	17.6245	down
CENPC	-0.548445	3.17728	-7.69377	3.0x10-12	3.0x10-9	17.4465	down
SNORA73	-0.730527	1.72894	-7.68165	3.2x10-12	3.1x10-9	17.3831	down
PDE3B	-0.957731	3.17964	-7.52057	7.7x10-12	6.3x10-9	16.5436	down
KAT6B	-0.588443	3.50694	-7.51346	8.0x10-12	6.4x10-9	16.5068	down
BALR6	-1.67548	2.52052	-7.48224	9.5x10-12	7.0x10-9	16.3449	down
MIS18BP1	-0.593874	4.90669	-7.46321	1.0x10-11	7.5x10-9	16.2464	down
CEP57	-0.513792	3.942	-7.45857	1.0x10-11	7.6x10-9	16.2224	down
LMAN1	-0.63197	4.26783	-7.45276	1.1x10-11	7.7x10-9	16.1923	down
GALNT1	-0.594848	4.58961	-7.44278	1.1x10-11	7.9x10-9	16.1407	down
TARS3	-0.551557	2.41127	-7.43997	1.1x10-11	7.9x10-9	16.1262	down
CASP6	-0.68072	3.78756	-7.4157	1.3x10-11	8.6x10-9	16.0008	down
WRN	-0.632601	3.25495	-7.3077	2.4x10-11	1.3x10-8	15.445	down
SCCPDH	-0.66213	4.94361	-7.29152	2.6x10-11	1.4x10-8	15.362	down
LINC02728	-0.572894	1.88401	-7.27465	2.8x10-11	1.5x10-8	15.2755	down
TASP1	-0.520353	2.49319	-7.27008	2.9x10-11	1.5x10-8	15.2521	down
MIR133A1HG	-0.593139	1.37555	-7.2455	3.3x10-11	1.6x10-8	15.1263	down
CERS6	-0.605869	3.86742	-7.15566	5.3x10-11	2.2x10-8	14.6681	down
NADK2	-0.533227	3.19694	-7.15277	5.4x10-11	2.2x10-8	14.6534	down
NADK2-AS1	-0.679166	2.46013	-7.1353	5.9x10-11	2.3x10-8	14.5646	down
KDM5B	-0.845568	4.26198	-7.12679	6.2x10-11	2.4x10-8	14.5214	down
ZNF548	-0.532255	3.16207	-7.02771	1.0x10-10	3.7x10-8	14.0198	down
PIKFYVE	-0.522103	4.45881	-7.01588	1.1x10-10	3.8x10-8	13.9601	down
RPL32P11	-0.666497	2.80664	-6.99321	1.2x10-10	4.3x10-8	13.8458	down
TOP2B	-0.53176	5.94452	-6.99002	1.2x10-10	4.3x10-8	13.8298	down
ZNF124	-0.653372	2.83251	-6.90653	1.9x10-10	6.1x10-8	13.4105	down
AKAP9	-0.613858	4.04559	-6.88245	2.2x10-10	6.6x10-8	13.2901	down
CDCA7L	-0.79141	3.90134	-6.81816	3.0x10-10	8.7x10-8	12.9693	down
NKTR	-0.504395	4.92283	-6.8091	3.2x10-10	9.0x10-8	12.9242	down
ZNF439	-0.852823	3.26169	-6.78649	3.6x10-10	1.0x10-7	12.8119	down
ZMAT1	-0.706459	3.31281	-6.76037	4.1x10-10	1.1x10-7	12.6822	down
HSPD1P11	-0.719905	1.10249	-6.74867	4.3x10-10	1.1x10-7	12.6242	down
C1QTNF3	-0.502456	1.94997	-6.73692	4.6x10-10	1.1x10-7	12.566	down
SERINC5	-0.921899	3.29289	-6.70322	5.5x10-10	1.3x10-7	12.3994	down
MIPEPP3	-0.932421	2.69503	-6.67759	6.3x10-10	1.5x10-7	12.273	down
TM7SF3	-0.849257	5.77459	-6.61788	8.5x10-10	1.9x10-7	11.9793	down
ITPR2	-0.758506	3.74177	-6.61603	8.6x10-10	1.9x10-7	11.9702	down
SLC25A36	-0.506535	4.39175	-6.59609	9.5x10-10	2.0x10-7	11.8724	down
ZNF117	-0.797166	3.14623	-6.59491	9.6x10-10	2.0x10-7	11.8666	down
DNAJB6	-0.566295	3.51238	-6.57492	1.0x10-9	2.2x10-7	11.7688	down
LINC00539	-1.19572	3.31386	-6.53483	1.3x10-9	2.5x10-7	11.5729	down
TTC3	-0.634683	4.53624	-6.44577	2.0x10-9	3.7x10-7	11.1401	down
CDK6-AS1	-1.5271	3.44814	-6.4418	2.0x10-9	3.7x10-7	11.1209	down
NDUFAF6	-0.50593	2.64083	-6.36387	3.0x10-9	5.1x10-7	10.7447	down
ZNF138	-0.598862	2.93777	-6.33733	3.4x10-9	5.7x10-7	10.6171	down
RPL23AP17	-0.648409	1.50696	-6.29341	4.3x10-9	6.7x10-7	10.4066	down
REV3L	-0.537995	3.33682	-6.2913	4.3x10-9	6.7x10-7	10.3965	down
STAG3L3	-0.598895	2.36368	-6.28864	4.4x10-9	6.7x10-7	10.3838	down
LINC01963	-0.521529	2.0167	-6.27572	4.7x10-9	7.1x10-7	10.322	down
ARL4AP4	-0.696258	3.37451	-6.22231	6.1x10-9	8.8x10-7	10.0675	down
TP53BP1	-0.522126	3.04882	-6.22073	6.2x10-9	8.9x10-7	10.06	down
STAG3L2	-0.70533	3.85618	-6.21842	6.2x10-9	8.9x10-7	10.049	down
BNIP3P11	-0.868339	3.0305	-6.20039	6.8x10-9	9.6x10-7	9.96335	down
KIZ	-0.530139	2.81907	-6.18803	7.2x10-9	1.0x10-6	9.90472	down
NUCB2	-0.840955	5.16005	-6.18334	7.4x10-9	1.0x10-6	9.88249	down
ERV3-1	-0.751037	3.70752	-6.17969	7.5x10-9	1.0x10-6	9.86522	down
CEP41	-0.514957	1.89783	-6.17725	7.6x10-9	1.0x10-6	9.85365	down
CORO1CP1	-0.753403	0.995075	-6.17185	7.8x10-9	1.0x10-6	9.82805	down
MIR181B1	-0.931406	1.39376	-6.1635	8.2x10-9	1.0x10-6	9.78857	down
ARL5B	-0.578701	3.31427	-6.15125	8.7x10-9	1.1x10-6	9.73064	down
GALNT7	-0.536544	4.05484	-6.12637	9.8x10-9	1.2x10-6	9.61318	down
ZNF107	-0.843398	3.32056	-6.12307	1.0x10-8	1.2x10-6	9.59763	down
CCDC57	-0.763117	3.07705	-6.0757	1.2x10-8	1.4x10-6	9.37478	down
ADGRA3	-0.767449	2.37627	-6.02911	1.5x10-8	1.7x10-6	9.15659	down
RIF1	-0.510958	3.50175	-6.0286	1.5x10-8	1.7x10-6	9.15417	down
RSL24D1P8	-0.525833	1.17321	-6.0274	1.5x10-8	1.7x10-6	9.1486	down
PEX3	-0.509898	2.93309	-5.99659	1.8x10-8	1.9x10-6	9.0048	down
SNORA19	-0.684113	2.26319	-5.98555	1.9x10-8	2.0x10-6	8.9534	down
ETV6	-0.536878	5.79459	-5.98279	1.9x10-8	2.0x10-6	8.94056	down
SLC25A39P1	-0.735308	1.76459	-5.9663	2.1x10-8	2.1x10-6	8.86387	down
RPL35AP6	-0.592282	1.46555	-5.94651	2.3x10-8	2.3x10-6	8.77199	down
TRIM24	-0.570548	3.76704	-5.94	2.4x10-8	2.3x10-6	8.74179	down
CPLANE1	-0.527105	2.46445	-5.92119	2.6x10-8	2.5x10-6	8.65473	down
ERI3-IT1	-0.528476	1.88165	-5.92087	2.6x10-8	2.5x10-6	8.65324	down
NT5C3AP2	-1.62407	3.32908	-5.88282	3.1x10-8	2.9x10-6	8.47749	down
HPS4	-0.568969	3.63342	-5.87354	3.3x10-8	3.0x10-6	8.43478	down
ZBED2	-1.08623	1.90559	-5.85549	3.6x10-8	3.2x10-6	8.35172	down
YPEL1	-0.54463	1.92433	-5.82924	4.1x10-8	3.5x10-6	8.23119	down
ZNF550	-0.54456	2.65126	-5.79859	4.7x10-8	3.9x10-6	8.09089	down
ZNF680	-0.521451	2.40146	-5.7948	4.8x10-8	3.9x10-6	8.07354	down
RN7SL481P	-0.699231	3.67316	-5.76946	5.4x10-8	4.4x10-6	7.95791	down
MIR181A1HG	-1.1523	2.47234	-5.75909	5.7x10-8	4.5x10-6	7.91066	down
SLC14A1	-0.830937	1.39236	-5.74833	6.0x10-8	4.7x10-6	7.86173	down
STT3B	-0.506441	5.99168	-5.73601	6.4x10-8	4.9x10-6	7.80573	down
STARD4-AS1	-0.759129	2.77865	-5.71406	7.1x10-8	5.3x10-6	7.70614	down
MIR571	-0.617328	2.17567	-5.71115	7.2x10-8	5.4x10-6	7.69298	down
ZNF84	-0.558512	2.79724	-5.70506	7.4x10-8	5.5x10-6	7.66535	down
ITM2A	-1.66668	5.11269	-5.6926	7.8x10-8	5.7x10-6	7.60901	down
LPO	-1.58534	2.56346	-5.68629	8.0x10-8	5.8x10-6	7.58049	down
SLC38A2	-0.542145	5.80835	-5.6845	8.1x10-8	5.9x10-6	7.57237	down
RNU6-101P	-0.682254	3.10814	-5.6812	8.2x10-8	5.9x10-6	7.55748	down
OR7E7P	-0.560447	2.11083	-5.67708	8.4x10-8	6.0x10-6	7.53889	down
LINC00216	-0.532679	2.54123	-5.67547	8.5x10-8	6.1x10-6	7.5316	down
GRK6P1	-0.884364	2.23462	-5.67442	8.5x10-8	6.1x10-6	7.52686	down
ANKRD27	-0.645541	3.97486	-5.65673	9.3x10-8	6.5x10-6	7.4471	down
AGPAT5	-0.633092	3.91295	-5.64837	9.6x10-8	6.7x10-6	7.40947	down
PRRT4	-1.34021	1.85722	-5.64685	9.7x10-8	6.7x10-6	7.40264	down
LINC01262	-0.56177	0.430735	-5.64437	9.8x10-8	6.8x10-6	7.3915	down
KIT	-1.27264	5.06479	-5.6155	1.1x10-7	7.5x10-6	7.2618	down
MYB	-0.609766	6.08467	-5.60138	1.2x10-7	7.9x10-6	7.19853	down
MAN1A1	-1.22645	4.96397	-5.58679	1.2x10-7	8.4x10-6	7.13326	down
LRRC28	-0.742399	2.16988	-5.58637	1.2x10-7	8.4x10-6	7.13139	down
ZNF254	-0.516443	2.58641	-5.58596	1.2x10-7	8.4x10-6	7.12952	down
GTF2I-AS1	-0.540054	2.39322	-5.58588	1.2x10-7	8.4x10-6	7.12918	down
CCND2	-1.06263	5.07864	-5.55986	1.4x10-7	9.1x10-6	7.01304	down
SMG1P3	-0.505312	2.6673	-5.55821	1.4x10-7	9.2x10-6	7.0057	down
ZNF292	-0.50152	3.81859	-5.54197	1.5x10-7	9.8x10-6	6.93334	down
CYTL1	-1.81249	4.76683	-5.54098	1.5x10-7	9.8x10-6	6.92894	down
NCOA7	-0.729323	3.84181	-5.53991	1.6x10-7	9.8x10-6	6.92419	down
ARPP21-AS1	-1.02247	0.705374	-5.53454	1.6x10-7	1.0x10-5	6.90033	down
KIF2A	-0.500279	4.14738	-5.53363	1.6x10-7	1.0x10-5	6.89627	down
ZNF66	-0.660726	2.53869	-5.52988	1.6x10-7	1.0x10-5	6.87963	down
ZNF660	-0.58289	2.44953	-5.52816	1.6x10-7	1.0x10-5	6.87198	down
RNU6-10P	-0.856057	4.0774	-5.52223	1.7x10-7	1.0x10-5	6.84562	down
KIF28P	-0.695476	1.76988	-5.51663	1.7x10-7	1.0x10-5	6.82077	down
RN7SL263P	-0.613863	2.36426	-5.50867	1.8x10-7	1.1x10-5	6.78547	down
RN7SL141P	-0.8457	2.47331	-5.50212	1.9x10-7	1.1x10-5	6.75647	down
BRCA1P1	-0.75062	4.11642	-5.4942	1.9x10-7	1.1x10-5	6.72141	down
UBE2CP3	-0.748418	1.73918	-5.4888	2.0x10-7	1.1x10-5	6.69751	down
MFSD1P1	-0.589265	2.4235	-5.47739	2.1x10-7	1.2x10-5	6.64708	down
BNIP3P42	-0.506427	1.66186	-5.47151	2.1x10-7	1.2x10-5	6.62113	down
RNF144A	-0.621257	3.42675	-5.46785	2.2x10-7	1.2x10-5	6.60495	down
SPART-AS1	-0.691723	2.04371	-5.46168	2.2x10-7	1.2x10-5	6.57778	down
RHOBTB3	-0.890749	2.2095	-5.46002	2.3x10-7	1.2x10-5	6.57044	down
SCMH1	-0.578897	4.35784	-5.42719	2.6x10-7	1.4x10-5	6.42599	down
HLTF	-0.545056	3.21087	-5.42717	2.6x10-7	1.4x10-5	6.42591	down
CBX2	-1.04356	2.7133	-5.41585	2.8x10-7	1.5x10-5	6.37625	down
SACS	-0.512928	2.73357	-5.40971	2.9x10-7	1.5x10-5	6.34933	down
RNA5SP194	-0.684466	2.73482	-5.40193	3.0x10-7	1.5x10-5	6.31524	down
THUMPD1	-0.522581	4.06523	-5.38723	3.2x10-7	1.6x10-5	6.25093	down
PDK1	-0.583375	2.67385	-5.36445	3.5x10-7	1.7x10-5	6.15147	down
CDK14	-0.664129	1.77255	-5.34756	3.8x10-7	1.9x10-5	6.07792	down
ACSM3	-1.21948	3.04243	-5.33755	4.0x10-7	1.9x10-5	6.0344	down
LINC00426	-0.848433	1.94338	-5.3225	4.3x10-7	2.1x10-5	5.96907	down
CERKL	-0.602752	4.67532	-5.31195	4.5x10-7	2.1x10-5	5.92333	down
OSTCP8	-0.524711	2.34298	-5.30578	4.6x10-7	2.2x10-5	5.8966	down
RPS12P31	-0.56775	2.02747	-5.30249	4.7x10-7	2.2x10-5	5.88237	down
ABHD17B	-0.527675	3.93463	-5.28877	5.0x10-7	2.3x10-5	5.82305	down
HIP1R	-0.649324	1.87877	-5.27394	5.3x10-7	2.4x10-5	5.75902	down
RNA5SP354	-0.771743	2.17564	-5.27163	5.4x10-7	2.5x10-5	5.74906	down
SLC22A16	-0.591126	3.26956	-5.26673	5.5x10-7	2.5x10-5	5.72794	down
NEDD4	-0.64292	2.56996	-5.26419	5.6x10-7	2.5x10-5	5.71699	down
PLAGL1	-0.627935	4.2396	-5.25987	5.7x10-7	2.5x10-5	5.69842	down
RPS27AP8	-0.742124	2.34074	-5.25845	5.7x10-7	2.6x10-5	5.69229	down
FBXW4P1	-0.542632	2.21228	-5.24893	6.0x10-7	2.7x10-5	5.65135	down
MIR128-2	-0.864657	0.571201	-5.23954	6.2x10-7	2.8x10-5	5.61099	down
RN7SL617P	-0.585286	1.70054	-5.23401	6.4x10-7	2.8x10-5	5.58727	down
ZNF551	-0.522873	2.80969	-5.22431	6.7x10-7	2.9x10-5	5.54567	down
FAF1-AS1	-0.585325	2.30154	-5.21942	6.8x10-7	3.0x10-5	5.52469	down
ZNRF2P2	-0.538106	2.27925	-5.21934	6.8x10-7	3.0x10-5	5.52437	down
C2CD2	-0.575193	2.73742	-5.21152	7.1x10-7	3.0x10-5	5.4909	down
KLHL23	-0.676654	2.13936	-5.21144	7.1x10-7	3.0x10-5	5.49054	down
MIR1285-1	-0.590815	3.39817	-5.21074	7.1x10-7	3.0x10-5	5.48755	down
RNA5SP82	-0.630967	4.34031	-5.2062	7.2x10-7	3.1x10-5	5.46814	down
PKD2	-0.642535	3.99786	-5.20159	7.4x10-7	3.1x10-5	5.44844	down
LINC02328	-0.545191	1.53028	-5.19965	7.5x10-7	3.2x10-5	5.44012	down
ZNF608	-0.924836	1.62042	-5.1945	7.6x10-7	3.2x10-5	5.41815	down
HNRNPA1P62	-0.607152	1.30229	-5.18673	7.9x10-7	3.3x10-5	5.38499	down
ARPP21	-0.802328	0.595025	-5.18489	8.0x10-7	3.3x10-5	5.37713	down
ZC3HAV1L	-0.627216	3.20173	-5.18436	8.0x10-7	3.3x10-5	5.37487	down
CENPJ	-0.562921	3.53742	-5.18244	8.1x10-7	3.3x10-5	5.36666	down
TRAV28	-0.556222	0.51981	-5.17104	8.5x10-7	3.5x10-5	5.31809	down
FNDC3B	-0.685689	4.27007	-5.16983	8.5x10-7	3.5x10-5	5.31293	down
LINC02244	-0.62283	1.28663	-5.16004	8.9x10-7	3.6x10-5	5.27129	down
ZNF43	-0.571194	3.07752	-5.15804	9.0x10-7	3.6x10-5	5.26279	down
ZNF221	-0.505745	1.71409	-5.15603	9.1x10-7	3.6x10-5	5.25427	down
GPSM2	-0.521676	2.62549	-5.15238	9.2x10-7	3.7x10-5	5.23876	down
HMGB1P14	-0.508028	2.85448	-5.13691	9.9x10-7	3.9x10-5	5.17312	down
ETF1P2	-0.513081	2.09035	-5.13466	1.0x10-6	3.9x10-5	5.16358	down
MIR3657	-0.524173	1.95969	-5.13327	1.0x10-6	3.9x10-5	5.15768	down
SNORA47	-0.647762	1.8434	-5.12681	1.0x10-6	4.0x10-5	5.13032	down
ATP10D	-0.524308	2.79126	-5.11841	1.0x10-6	4.1x10-5	5.09476	down
PM20D2	-0.6958	4.26475	-5.11621	1.0x10-6	4.1x10-5	5.08549	down
LINC01114	-0.569989	0.598067	-5.11562	1.0x10-6	4.2x10-5	5.08298	down
SIX3	-1.11409	0.612555	-5.11508	1.0x10-6	4.2x10-5	5.08068	down
ZNF85	-0.515523	2.18997	-5.10663	1.1x10-6	4.3x10-5	5.04501	down
ERG	-0.959476	3.85953	-5.08127	1.2x10-6	4.7x10-5	4.93808	down
RNU6-79P	-0.641303	1.85488	-5.07324	1.3x10-6	4.8x10-5	4.90433	down
VPS13C	-0.535663	4.41714	-5.06453	1.3x10-6	4.9x10-5	4.86771	down
TRAT1	-0.904608	2.02979	-5.04426	1.4x10-6	5.3x10-5	4.78272	down
TRH	-2.02504	2.53806	-5.04302	1.5x10-6	5.3x10-5	4.77751	down
SNORD58	-0.569049	1.99418	-5.03987	1.5x10-6	5.4x10-5	4.76434	down
TARBP1	-0.567126	4.75625	-5.01775	1.6x10-6	5.8x10-5	4.67187	down
RDM1P3	-0.701014	1.85454	-5.01092	1.7x10-6	5.9x10-5	4.6434	down
TEC	-0.624192	4.26217	-5.0072	1.7x10-6	6.0x10-5	4.62787	down
REXO5	-0.523176	2.95006	-5.00268	1.7x10-6	6.1x10-5	4.60906	down
LINC01833	-0.765438	0.422591	-4.98704	1.9x10-6	6.4x10-5	4.54399	down
NBAT1	-0.575319	0.571673	-4.97746	1.9x10-6	6.6x10-5	4.5042	down
RNU6-1208P	-0.831298	2.31208	-4.97717	2.0x10-6	6.6x10-5	4.50297	down
MIR5692A1	-0.816882	3.51036	-4.96783	2.0x10-6	6.8x10-5	4.46424	down
WASF1	-1.00943	3.32635	-4.94561	2.2x10-6	7.4x10-5	4.37227	down
RN7SL67P	-0.629143	1.96156	-4.92613	2.4x10-6	8.0x10-5	4.29187	down
KIAA1549	-0.633199	1.68431	-4.92283	2.5x10-6	8.0x10-5	4.27827	down
LRRC37A16P	-0.589055	2.53134	-4.90973	2.6x10-6	8.4x10-5	4.22436	down
ABTB3	-0.776892	2.10686	-4.89852	2.8x10-6	8.7x10-5	4.17832	down
MIR340	-0.748595	2.41028	-4.89735	2.8x10-6	8.7x10-5	4.17349	down
SNORD19C	-0.577365	2.86925	-4.89308	2.8x10-6	8.9x10-5	4.15599	down
ZNF721	-0.676926	2.42324	-4.89211	2.8x10-6	8.9x10-5	4.152	down
MIR4659A	-0.772236	2.48279	-4.88696	2.9x10-6	9.1x10-5	4.13089	down
LRP12	-0.505925	1.31508	-4.88675	2.9x10-6	9.1x10-5	4.13003	down
PLEKHA5	-0.55527	2.16058	-4.88444	2.9x10-6	9.1x10-5	4.12056	down
CASP3	-0.53532	4.53795	-4.88367	2.9x10-6	9.1x10-5	4.11741	down
MIR548AC	-0.735974	1.9008	-4.87126	3.1x10-6	9.5x10-5	4.06658	down
SMYD3-IT1	-0.517081	2.19013	-4.8689	3.1x10-6	9.6x10-5	4.05695	down
TSPOAP1	-0.993219	4.52542	-4.83806	3.6x10-6	0.000107025	3.93113	down
TVP23CP1	-0.526724	0.833681	-4.83071	3.7x10-6	0.000109723	3.90119	down
RN7SL535P	-0.605275	2.40619	-4.82689	3.8x10-6	0.000110589	3.88568	down
ALS2	-0.730835	3.0922	-4.82566	3.8x10-6	0.000110842	3.88069	down
RPL21P30	-0.552751	2.47514	-4.82497	3.8x10-6	0.000111087	3.87788	down
INO80D-AS2	-0.543887	2.63589	-4.82458	3.8x10-6	0.000111159	3.87629	down
UGT3A2	-1.28852	1.23655	-4.81829	3.9x10-6	0.000113456	3.85074	down
POLE	-0.552646	3.83971	-4.80214	4.2x10-6	0.000119427	3.78525	down
RAVER2	-0.559323	3.19949	-4.80072	4.2x10-6	0.000119823	3.77951	down
RPL6P6	-0.524604	1.42124	-4.79966	4.2x10-6	0.000120174	3.77521	down
RNU6-260P	-0.650838	1.65775	-4.79824	4.3x10-6	0.000120726	3.76947	down
CASC15	-0.818269	0.958009	-4.79732	4.3x10-6	0.000121026	3.76575	down
NAP1L4P1	-0.52324	2.06915	-4.77505	4.7x10-6	0.000130854	3.67578	down
ZBED3	-0.647586	3.0027	-4.76744	4.9x10-6	0.000134476	3.64508	down
CENPU	-0.545256	3.93919	-4.76446	4.9x10-6	0.000135491	3.6331	down
SPTBN1-AS2	-0.549539	1.87448	-4.76425	4.9x10-6	0.000135491	3.63223	down
MIR2909	-0.637224	1.84469	-4.7632	4.9x10-6	0.000135862	3.62802	down
MIR626	-0.542539	1.44662	-4.75758	5.1x10-6	0.000138479	3.6054	down
CASTOR2	-0.535413	2.57154	-4.75494	5.1x10-6	0.000139527	3.59476	down
RNU6-446P	-0.808605	1.07142	-4.7493	5.2x10-6	0.000142298	3.57209	down
MACF1	-0.505927	4.67162	-4.74821	5.3x10-6	0.000142562	3.56772	down
DEPDC7	-0.622125	1.48172	-4.74733	5.3x10-6	0.000142811	3.56416	down
RNU7-75P	-0.605343	3.21789	-4.74378	5.4x10-6	0.00014456	3.54992	down
TRAV34	-0.520594	0.601856	-4.74194	5.4x10-6	0.000145293	3.54251	down
SNORD53B	-0.615393	2.60398	-4.71686	6.0x10-6	0.000157426	3.44203	down
CD38	-0.861626	4.75541	-4.71588	6.0x10-6	0.000157426	3.43813	down
PXK	-0.510005	4.73894	-4.70956	6.2x10-6	0.000160733	3.41287	down
FIRRE	-0.628659	2.65379	-4.70352	6.4x10-6	0.000163233	3.38872	down
CD96	-1.44973	4.28383	-4.68961	6.8x10-6	0.000171903	3.33328	down
ZNF493	-0.508087	2.39132	-4.68672	6.8x10-6	0.00017377	3.32177	down
TRAV37	-0.503642	0.48358	-4.66675	7.4x10-6	0.000185779	3.24237	down
HK2	-0.540901	3.90693	-4.66094	7.6x10-6	0.000189257	3.21932	down
TRPC6P10	-0.542957	3.27567	-4.65879	7.7x10-6	0.000190721	3.21079	down
ZNF460	-0.569328	3.71386	-4.65599	7.8x10-6	0.000191869	3.19972	down
RIMKLBP2	-0.53191	3.17606	-4.65367	7.8x10-6	0.000193447	3.19053	down
ACSM1	-1.0952	2.18456	-4.65343	7.9x10-6	0.000193447	3.18955	down
MIR3136	-0.637618	2.37473	-4.63496	8.5x10-6	0.000205177	3.11651	down
RNU6-522P	-0.779505	3.27653	-4.6336	8.5x10-6	0.000206218	3.11111	down
C9orf43	-0.812107	2.04051	-4.63254	8.6x10-6	0.000206992	3.10696	down
ZNF91	-0.515613	2.58776	-4.62968	8.7x10-6	0.000208704	3.09565	down
TP53INP1	-0.576483	4.12043	-4.62637	8.8x10-6	0.000211071	3.08261	down
RNU6-141P	-0.66587	2.81701	-4.62577	8.8x10-6	0.000211475	3.08021	down
MIR548O	-0.563326	2.99154	-4.62521	8.8x10-6	0.000211835	3.07801	down
CD200	-1.2753	2.91576	-4.62238	8.9x10-6	0.000213813	3.06687	down
MIR5692C2	-0.706702	3.08544	-4.60888	9.5x10-6	0.000223406	3.01368	down
STMN1	-0.598841	5.36155	-4.60674	9.5x10-6	0.000224717	3.00528	down
LINC01252	-0.626382	1.42421	-4.59955	9.8x10-6	0.000230124	2.97702	down
LINC00674	-0.573533	3.46611	-4.59918	9.8x10-6	0.000230203	2.97557	down
RNU6-425P	-0.66406	1.83976	-4.59585	1.0x10-5	0.000232298	2.96247	down
LINC00707	-0.916548	0.915257	-4.57587	1.0x10-5	0.000246869	2.88414	down
RNU6-377P	-0.686251	2.82434	-4.56955	1.1x10-5	0.000252428	2.85944	down
MIR573	-0.525539	3.59802	-4.55783	1.1x10-5	0.000262698	2.81364	down
ZDHHC23	-0.583137	2.05689	-4.55644	1.1x10-5	0.0002633	2.80823	down
MIR186	-0.539312	4.00126	-4.54587	1.2x10-5	0.000272384	2.76702	down
TDGF1P6	-0.503005	2.39274	-4.54562	1.2x10-5	0.000272384	2.76605	down
TRBV6-8	-0.572112	0.998046	-4.53182	1.3x10-5	0.000284325	2.71233	down
TRBV7-7	-0.701138	1.50238	-4.52893	1.3x10-5	0.000287227	2.70111	down
ZNF253	-0.51175	2.69995	-4.51895	1.3x10-5	0.000296554	2.66239	down
RNU4ATAC12P	-0.552998	3.44144	-4.515	1.4x10-5	0.000299901	2.64706	down
MORF4L1P3	-0.64326	1.81402	-4.51212	1.4x10-5	0.00030229	2.63591	down
GPR174	-0.838058	3.40667	-4.51048	1.4x10-5	0.000303826	2.62955	down
TFRC	-0.665671	5.1955	-4.50809	1.4x10-5	0.000305975	2.62028	down
RNA5SP465	-0.577769	2.99863	-4.49839	1.5x10-5	0.000316083	2.58276	down
RNA5SP260	-0.570373	2.26292	-4.49507	1.5x10-5	0.000320035	2.56995	down
SSBP2	-0.629917	3.28703	-4.48673	1.5x10-5	0.000328615	2.53772	down
MIR550A1	-0.569659	1.73992	-4.48525	1.5x10-5	0.000330348	2.53203	down
PPIAP41	-0.562595	3.81388	-4.48517	1.5x10-5	0.000330348	2.53172	down
PGBD4P1	-1.37486	1.94573	-4.47521	1.6x10-5	0.000339646	2.49334	down
AK4	-0.651741	1.30073	-4.45863	1.7x10-5	0.000359435	2.42955	down
SNRPCP16	-0.538661	1.1672	-4.45143	1.8x10-5	0.000367848	2.40194	down
B4GALT6	-0.888697	3.34612	-4.44432	1.8x10-5	0.000375622	2.37466	down
RPS20P22	-0.530716	0.718306	-4.44236	1.8x10-5	0.000378219	2.36715	down
RNA5SP527	-0.592484	2.1608	-4.43085	1.9x10-5	0.000391284	2.32311	down
RNU6-1257P	-0.60024	1.78588	-4.42623	2.0x10-5	0.000396533	2.30546	down
TSPAN13	-0.884256	2.73954	-4.42447	2.0x10-5	0.000398579	2.2987	down
SNORD117	-0.511258	3.91122	-4.41571	2.0x10-5	0.000408144	2.26531	down
RN7SL280P	-0.551733	2.29232	-4.41491	2.1x10-5	0.000408863	2.26223	down
RNY1P13	-0.604061	3.36741	-4.40991	2.1x10-5	0.000415719	2.24318	down
RNU4-31P	-0.580338	1.80519	-4.40705	2.1x10-5	0.000419278	2.23229	down
E2F3-IT1	-0.519655	2.75833	-4.39863	2.2x10-5	0.000431145	2.20025	down
RPS3AP34	-0.685812	2.59394	-4.39652	2.2x10-5	0.000433968	2.19221	down
SNORA50A	-0.554688	2.12003	-4.39562	2.2x10-5	0.000435313	2.18881	down
ELOCP28	-0.534661	1.49875	-4.39095	2.3x10-5	0.000442399	2.17104	down
PLD1	-0.525745	2.76121	-4.38809	2.3x10-5	0.000446036	2.16021	down
TRBV5-7	-0.593745	1.17612	-4.38198	2.3x10-5	0.000454879	2.13702	down
TRD-AS1	-1.09885	2.50105	-4.3757	2.4x10-5	0.000464427	2.11322	down
LINC01341	-0.690309	2.45831	-4.37077	2.5x10-5	0.000472087	2.09454	down
PDZD8	-0.68155	3.43894	-4.36353	2.5x10-5	0.000483381	2.06716	down
ANKRD28	-0.602383	4.76284	-4.36172	2.5x10-5	0.000485724	2.06033	down
MIR4762	-0.650883	2.42581	-4.35716	2.6x10-5	0.000492305	2.04308	down
RRAGD	-0.53714	2.95997	-4.35077	2.7x10-5	0.000502042	2.01899	down
RN7SL517P	-0.525399	1.8921	-4.34223	2.8x10-5	0.000515379	1.98679	down
MIR3684	-0.533497	1.35056	-4.33469	2.8x10-5	0.000528098	1.95841	down
MPO	-2.09403	9.19558	-4.32267	3.0x10-5	0.000546797	1.91324	down
SPTBN1	-0.587415	3.67655	-4.30353	3.2x10-5	0.000582365	1.84152	down
BCL2	-0.560395	3.36236	-4.29859	3.3x10-5	0.000592504	1.82305	down
MIR181A1	-0.509932	0.649013	-4.29811	3.3x10-5	0.000593372	1.82123	down
ITM2C	-0.92329	5.88199	-4.29625	3.3x10-5	0.000596659	1.8143	down
BNIP3P27	-0.509317	2.59147	-4.27765	3.6x10-5	0.000635162	1.74489	down
APBA1	-0.524929	0.500212	-4.27137	3.7x10-5	0.000647348	1.72153	down
BCR	-0.522791	3.92018	-4.25594	3.9x10-5	0.000679683	1.66419	down
CACNA1C-AS1	-0.620164	1.67889	-4.25316	3.9x10-5	0.000685629	1.65389	down
CALR	-0.636714	8.49146	-4.2509	4.0x10-5	0.000690532	1.6455	down
KIAA1958	-0.500325	1.89786	-4.25001	4.0x10-5	0.000692045	1.6422	down
RN7SKP275	-0.751399	1.51225	-4.24681	4.0x10-5	0.000699855	1.63035	down
LOXL4	-0.719591	1.41217	-4.24212	4.1x10-5	0.000710976	1.61298	down
BNIP3P17	-0.511672	1.69703	-4.24015	4.1x10-5	0.00071494	1.60568	down
RNU6-409P	-0.906117	1.53588	-4.23923	4.2x10-5	0.000717218	1.60227	down
LINC02593	-0.871781	1.46549	-4.23368	4.3x10-5	0.000728996	1.58177	down
RNU4-9P	-0.619171	3.16188	-4.2321	4.3x10-5	0.000732427	1.57591	down
RNA5SP311	-0.879956	2.84008	-4.21738	4.5x10-5	0.00076915	1.5216	down
ANKRD36C	-0.528033	3.15585	-4.21457	4.6x10-5	0.000776962	1.51125	down
TMIGD2	-1.05069	2.42715	-4.21281	4.6x10-5	0.000779657	1.50476	down
P2RX5	-0.610389	1.88529	-4.21245	4.6x10-5	0.000780099	1.50343	down
MIR6806	-0.54324	1.08694	-4.20843	4.7x10-5	0.000789718	1.48865	down
CLEC4OP	-2.00754	2.78897	-4.2058	4.8x10-5	0.000797111	1.47898	down
STAP1	-0.679361	2.98193	-4.2051	4.8x10-5	0.000797802	1.4764	down
MIR374B	-0.635797	4.01774	-4.19979	4.9x10-5	0.000810844	1.45687	down
SNORA68B	-0.588041	2.88696	-4.18817	5.1x10-5	0.000839902	1.41425	down
AUTS2	-0.581578	1.95762	-4.18092	5.2x10-5	0.000857124	1.38767	down
RNA5SP345	-0.526756	1.6373	-4.17701	5.3x10-5	0.000866994	1.37337	down
MCTP2	-0.628643	3.21914	-4.17175	5.4x10-5	0.000881207	1.35415	down
MIR5190	-0.861017	2.27906	-4.16179	5.6x10-5	0.000907449	1.31779	down
ALDH5A1	-0.543681	3.0256	-4.15552	5.8x10-5	0.000922473	1.2949	down
RN7SL646P	-0.935738	1.57609	-4.15355	5.8x10-5	0.000927455	1.28775	down
SMC5-DT	-0.711653	1.56629	-4.13458	6.3x10-5	0.000986537	1.21876	down
MIR3680-1	-0.523965	2.71029	-4.13428	6.3x10-5	0.000986893	1.21767	down
C21orf91	-0.604419	3.25151	-4.12391	6.5x10-5	0.00101774	1.18009	down
TMEM263	-0.526677	2.99327	-4.11808	6.7x10-5	0.00103712	1.15897	down
SMIM24	-0.965924	4.7267	-4.11171	6.9x10-5	0.0010599	1.13592	down
MPZL1	-0.527508	3.29162	-4.11031	6.9x10-5	0.00106426	1.13088	down
MAGOH2P	-0.541267	2.64758	-4.10369	7.1x10-5	0.00108702	1.10696	down
RAB7B	-0.999183	3.44961	-4.096	7.3x10-5	0.00111474	1.07922	down
ZNF385C	-0.636141	1.32019	-4.08999	7.5x10-5	0.00113439	1.05757	down
RNA5SP123	-0.542503	2.32968	-4.08858	7.5x10-5	0.00113844	1.05249	down
MIR4677	-0.550419	2.81045	-4.08848	7.5x10-5	0.00113844	1.05214	down
RNU6-944P	-0.622811	1.30631	-4.08321	7.6x10-5	0.00115804	1.03317	down
RNA5SP277	-0.799334	2.09317	-4.0702	8.0x10-5	0.00120538	0.986471	down
MEST	-1.09845	3.79086	-4.0681	8.1x10-5	0.0012137	0.978929	down
MIR576	-0.558865	3.17681	-4.06601	8.2x10-5	0.00122154	0.971438	down
TRDV2	-0.671074	1.12648	-4.06236	8.3x10-5	0.00123392	0.958376	down
RNA5SP464	-0.506276	2.77866	-4.06079	8.3x10-5	0.0012383	0.952751	down
DEPTOR	-0.724296	3.61507	-4.06055	8.3x10-5	0.0012383	0.951883	down
ITGA6	-0.714725	3.83074	-4.05746	8.4x10-5	0.00125194	0.940852	down
GATM	-0.707359	1.16852	-4.05725	8.4x10-5	0.00125251	0.940069	down
TRBV7-6	-0.57628	1.47874	-4.05358	8.6x10-5	0.00126722	0.926964	down
HIVEP2	-0.547745	2.52683	-4.04675	8.8x10-5	0.00129376	0.902541	down
MIR4639	-0.603742	2.26698	-4.04512	8.8x10-5	0.00129753	0.896751	down
RNA5SP268	-0.5029	1.68768	-4.03935	9.0x10-5	0.00132021	0.876174	down
LAX1	-0.554813	2.19814	-4.03484	9.2x10-5	0.00133903	0.860075	down
ARHGAP5	-0.743061	2.18446	-4.02953	9.4x10-5	0.00136167	0.84119	down
TRBV6-7	-0.551679	1.15618	-4.01082	0.000101228	0.00144025	0.774717	down
VWCE	-0.557533	1.63894	-4.00773	0.000102415	0.00145487	0.763748	down
CYP4F2	-0.552891	0.814213	-4.00358	0.000104026	0.00147187	0.749067	down
RNU6-548P	-0.528767	1.82788	-3.97728	0.000114829	0.00159631	0.656167	down
STK32B	-0.751514	1.81344	-3.97211	0.000117073	0.00162407	0.637975	down
GYPC	-0.821088	4.66668	-3.96759	0.000119071	0.00164656	0.622074	down
RNU6-202P	-0.517288	1.04886	-3.96181	0.00012167	0.00167346	0.601787	down
TENT5C	-0.744955	3.35049	-3.95659	0.000124068	0.0017001	0.583447	down
RPS6KA2	-0.692514	1.70706	-3.94543	0.000129342	0.00175002	0.544337	down
ATP9A	-0.664072	0.953592	-3.93917	0.000132395	0.00178326	0.522431	down
SNORD127	-0.516999	1.54307	-3.93424	0.000134845	0.00180946	0.505211	down
BMS1P1	-0.73366	2.58774	-3.93276	0.000135589	0.00181759	0.500043	down
RPS2P52	-0.783937	3.3735	-3.9301	0.000136937	0.00183254	0.490755	down
RN7SL334P	-0.65519	3.35655	-3.92484	0.00013964	0.00185861	0.472405	down
TPM4	-0.532444	5.74445	-3.92127	0.000141502	0.00188049	0.459973	down
GALNT3	-0.517628	2.20625	-3.92007	0.000142132	0.00188605	0.4558	down
PPM1H	-0.568282	2.08117	-3.91955	0.00014241	0.00188847	0.453965	down
ANKRD33B	-0.565968	1.87381	-3.91682	0.000143858	0.00190209	0.444469	down
CENPF	-0.566641	3.18458	-3.91679	0.000143872	0.00190209	0.444379	down
ZNF737	-0.534392	2.43953	-3.91282	0.000146009	0.00192248	0.430544	down
MIR3115	-0.515305	1.90498	-3.90966	0.000147728	0.0019394	0.419561	down
RNU6-194P	-0.788583	2.83895	-3.90688	0.000149256	0.00195167	0.4099	down
TBC1D16	-0.504097	1.46817	-3.90576	0.000149876	0.00195718	0.406013	down
RNU2-25P	-0.532463	1.94837	-3.89954	0.000153364	0.00199611	0.384428	down
MIR3134	-0.765641	2.50356	-3.89717	0.000154713	0.00200969	0.376209	down
MIR623	-0.553083	2.82622	-3.89594	0.000155418	0.00201692	0.371947	down
RNU6-198P	-0.519413	2.98905	-3.88021	0.000164704	0.00211853	0.317516	down
RNU6-789P	-0.554538	3.20388	-3.85744	0.000179089	0.00225858	0.239024	down
MIR640	-0.576902	2.90738	-3.85183	0.00018281	0.00229308	0.21975	down
RNU6-613P	-0.510082	2.49107	-3.8481	0.000185324	0.00231719	0.206955	down
ACCS	-0.602947	3.80869	-3.84777	0.00018555	0.00231855	0.205813	down
MEGF6	-0.712567	3.73726	-3.83912	0.000191516	0.00237877	0.176163	down
LDLRAD4	-0.569327	2.03561	-3.83666	0.000193249	0.00239596	0.167725	down
RNU105B	-0.520478	1.74964	-3.83036	0.000197744	0.00243998	0.146191	down
THSD7A	-0.77908	0.74962	-3.81481	0.000209284	0.0025526	0.0930839	down
AFF2	-0.723419	1.29539	-3.8077	0.000214765	0.00260835	0.0688831	down
RNU6-1283P	-0.584694	2.23043	-3.80492	0.000216954	0.00263169	0.0593931	down
PGAM1P10	-0.579866	1.99148	-3.79829	0.000222238	0.00268012	0.0368738	down
FGFR1	-0.834741	1.7111	-3.79645	0.000223726	0.00269312	0.0306285	down
TRAF5	-0.520072	2.80949	-3.78552	0.000232772	0.0027833	-0.00645052	down
FNBP1L	-0.710225	1.97529	-3.78179	0.000235936	0.00281163	-0.0190816	down
ZNF8-DT	-0.526549	2.91698	-3.76973	0.000246448	0.00290627	-0.0598426	down
LPAR4	-0.649999	1.74194	-3.74853	0.000266015	0.00308532	-0.131258	down
RNA5SP195	-0.532575	3.12091	-3.74766	0.000266851	0.00309307	-0.13419	down
RHEX	-1.00787	4.5874	-3.74092	0.000273398	0.00315192	-0.156836	down
RNU6-681P	-0.581369	2.35357	-3.74062	0.00027369	0.00315391	-0.157833	down
AFF2-IT1	-0.514269	0.768393	-3.73961	0.000274679	0.00316346	-0.161203	down
PCBP3	-0.685267	1.0746	-3.73806	0.000276215	0.00317652	-0.166414	down
HHIP-AS1	-0.540618	0.728702	-3.73295	0.000281329	0.00322029	-0.183548	down
UGT2B11	-1.07056	1.4512	-3.72548	0.000288962	0.00328571	-0.20855	down
RNU7-180P	-0.505113	2.18711	-3.7118	0.000303449	0.00340913	-0.254223	down
RNU6-135P	-0.619421	2.91343	-3.70979	0.000305636	0.00342394	-0.260927	down
RNA5SP371	-0.571727	1.30721	-3.70048	0.000315958	0.00351163	-0.291927	down
CDCA7	-0.711626	4.29186	-3.69992	0.000316595	0.00351771	-0.293806	down
IRX1	-0.756452	0.757484	-3.68733	0.000331106	0.00364708	-0.33562	down
CELF2-AS1	-0.531651	3.69506	-3.68014	0.000339673	0.0037227	-0.359444	down
SLC24A3-AS1	-0.723991	1.35515	-3.67166	0.00035005	0.00380889	-0.387505	down
MIR7850	-0.5582	1.9443	-3.66318	0.000360716	0.00388752	-0.415489	down
RN7SKP240	-0.661678	0.891201	-3.65199	0.00037528	0.00400926	-0.452378	down
KCNQ5-AS1	-0.540774	1.75701	-3.64392	0.000386117	0.00409617	-0.478903	down
ABCB1	-0.72435	1.46527	-3.6389	0.000393005	0.00414914	-0.495376	down
PLXNB1	-0.653307	1.63161	-3.6333	0.000400834	0.00420924	-0.513748	down
MIR548E	-0.545784	2.08865	-3.6209	0.000418688	0.0043538	-0.554324	down
DPY19L2	-0.76798	2.39013	-3.61485	0.000427674	0.00442391	-0.574094	down
C1orf21	-0.584029	1.50118	-3.61185	0.000432201	0.00445902	-0.583892	down
TOX-DT	-0.632125	2.47604	-3.60092	0.000449061	0.00459687	-0.619505	down
RNU6-142P	-0.532298	2.29364	-3.59363	0.000460635	0.00469705	-0.643178	down
RNU6-26P	-0.517237	1.11426	-3.58803	0.000469727	0.00476878	-0.661356	down
CACNA1C-AS2	-0.654239	2.33719	-3.58484	0.000474979	0.00480929	-0.671698	down
TUBA5P	-0.559159	1.74569	-3.57024	0.000499752	0.0049996	-0.718966	down
RNA5SP210	-0.514843	1.35099	-3.55928	0.000519137	0.00514387	-0.754334	down
HENMT1	-0.59107	3.59941	-3.55293	0.000530685	0.0052261	-0.774775	down
SCML2	-0.538001	2.88601	-3.54692	0.000541834	0.00530672	-0.794087	down
MIR222	-0.594848	2.75309	-3.54674	0.000542187	0.00530747	-0.794693	down
MIR4304	-0.50108	1.47918	-3.54463	0.000546157	0.00533712	-0.801468	down
KIF26B-AS1	-0.501024	0.786541	-3.54169	0.00055173	0.00537425	-0.810896	down
GNA15-DT	-0.618175	3.38543	-3.53007	0.000574314	0.0055449	-0.848145	down
RNU1-109P	-0.568067	1.65645	-3.52209	0.000590329	0.00566089	-0.873674	down
RNU6-514P	-0.570174	2.34413	-3.52113	0.000592282	0.00567252	-0.876739	down
GNG7	-0.542921	2.73361	-3.51996	0.000594656	0.00568835	-0.880452	down
SLC24A3	-0.830349	1.74608	-3.51436	0.000606219	0.00577094	-0.898322	down
FAM180B	-0.56256	1.53665	-3.50114	0.000634373	0.00598403	-0.940432	down
PYHIN1	-0.616451	2.09643	-3.47776	0.000687184	0.00635791	-1.01456	down
RNA5SP33	-0.568846	3.0147	-3.45341	0.000746549	0.00679969	-1.09132	down
MRC2	-0.824458	2.44313	-3.44108	0.000778422	0.00702827	-1.13002	down
UNCX	-0.677275	0.519637	-3.44093	0.000778817	0.00703022	-1.13049	down
UMODL1	-0.714144	1.37315	-3.4376	0.000787643	0.00709527	-1.14092	down
CD44-AS1	-0.529706	3.15825	-3.43092	0.000805644	0.00721619	-1.16183	down
MIR421	-0.503926	4.22866	-3.40907	0.000867226	0.00763589	-1.22995	down
MIR3667	-0.514027	1.13697	-3.40846	0.000869	0.00764468	-1.23184	down
ASPM	-0.511771	2.61366	-3.39121	0.000920829	0.00800858	-1.28538	down
ZNF154	-0.559813	2.55759	-3.39117	0.000920933	0.00800858	-1.28548	down
RETREG1	-0.504137	1.24049	-3.38955	0.000925964	0.00804196	-1.29052	down
RNU6-123P	-0.687871	1.52164	-3.37741	0.00096434	0.00828322	-1.32802	down
APP	-1.18654	3.6513	-3.37669	0.000966647	0.00829628	-1.33023	down
GPT2	-0.630262	2.52459	-3.36126	0.0010177	0.00863847	-1.37774	down
RN7SL648P	-0.50737	3.6203	-3.35346	0.00104447	0.00880129	-1.4017	down
SAMD11	-0.528113	1.13457	-3.34509	0.00107391	0.0089879	-1.42735	down
SMYD3-AS1	-0.51847	2.51798	-3.32989	0.00112936	0.00935462	-1.47377	down
DOC2B	-0.558186	0.71865	-3.30954	0.00120786	0.00988713	-1.53568	down
NTNG2	-1.01561	3.02989	-3.3094	0.00120838	0.00988713	-1.53608	down
EMID1	-0.757844	3.40756	-3.30938	0.00120847	0.00988713	-1.53615	down
SUCNR1	-0.813866	3.42355	-3.30079	0.00124313	0.0100912	-1.56219	down
TRGV10	-0.822431	1.65607	-3.2996	0.00124798	0.0101202	-1.56578	down
AGAP13P	-0.641616	2.20792	-3.28927	0.00129105	0.0103925	-1.59701	down
SNORD114-7	-0.506582	0.324955	-3.27787	0.00134014	0.0107219	-1.63135	down
MIR1200	-0.574239	2.09637	-3.25648	0.00143701	0.011324	-1.69552	down
SLC25A29	-0.534838	4.23484	-3.25551	0.00144157	0.0113481	-1.69844	down
MIR3142HG	-0.610322	1.88579	-3.25454	0.00144612	0.0113736	-1.70133	down
CSGALNACT1	-0.590823	1.93414	-3.239	0.001521	0.0118261	-1.74772	down
IKZF2	-0.72945	1.8267	-3.23556	0.00153804	0.0119275	-1.75795	down
LINC01645	-0.802397	0.876766	-3.23023	0.00156484	0.012076	-1.77381	down
RNU7-13P	-0.532739	1.79852	-3.22962	0.00156791	0.0120949	-1.77561	down
SHD	-0.717758	1.1224	-3.22504	0.00159132	0.0122443	-1.78922	down
TRGJP	-0.565674	1.27216	-3.22177	0.00160823	0.0123456	-1.79892	down
MIR4774	-0.530903	2.05211	-3.2213	0.00161066	0.0123618	-1.80031	down
SNORD114-3	-0.518621	0.340154	-3.2129	0.00165493	0.0126523	-1.82519	down
RNU6-82P	-0.523853	2.35293	-3.1974	0.00173957	0.0131438	-1.87094	down
CRACD	-0.54494	1.42067	-3.19321	0.00176313	0.0132796	-1.88328	down
CTSLP2	-0.88987	0.733195	-3.18506	0.00180984	0.0135449	-1.90724	down
TOP2A	-0.540627	4.28195	-3.17721	0.00185588	0.0138213	-1.93026	down
SLCO5A1	-0.55078	0.812785	-3.17407	0.00187459	0.0139343	-1.93945	down
PALM	-0.693251	1.8479	-3.17066	0.00189513	0.0140419	-1.94943	down
LINC02595	-0.597536	1.54826	-3.1667	0.00191926	0.014194	-1.96102	down
TRDJ3	-0.65191	0.968982	-3.14908	0.00202999	0.0148568	-2.01237	down
RNU2-5P	-0.644794	1.38025	-3.13558	0.00211884	0.0153814	-2.05155	down
DNM1	-0.685019	2.78186	-3.12523	0.00218937	0.0157743	-2.08149	down
RN7SL449P	-0.500469	1.77603	-3.11375	0.0022702	0.0162202	-2.11462	down
S100B	-0.884321	2.03172	-3.10138	0.00236028	0.0166734	-2.15016	down
CST7	-0.943834	6.20366	-3.09945	0.00237464	0.0167538	-2.1557	down
POU4F1	-0.887693	0.654418	-3.09605	0.00240013	0.0169004	-2.16545	down
STAR	-0.501482	2.50307	-3.08302	0.0025002	0.0174553	-2.20272	down
RNU6ATAC36P	-0.575096	2.05109	-3.07512	0.00256278	0.0177757	-2.22528	down
COL23A1	-0.879622	2.18484	-3.07379	0.00257341	0.0178275	-2.22905	down
SLC7A5	-0.563126	4.25349	-3.06475	0.00264702	0.0182221	-2.25476	down
CERCAM	-0.589527	2.44347	-3.06456	0.00264859	0.0182297	-2.2553	down
MEG3	-1.04521	1.09287	-3.06413	0.00265216	0.0182416	-2.25653	down
PROSER2-AS1	-0.644158	1.33845	-3.05882	0.00269637	0.0184715	-2.2716	down
SNORD113-3	-0.517671	0.391389	-3.05629	0.00271765	0.018585	-2.27876	down
MEX3B	-0.59934	2.66545	-3.05538	0.00272537	0.0186248	-2.28135	down
GNG2	-0.518901	3.04952	-3.04063	0.00285301	0.019293	-2.32304	down
LINC00926	-0.653182	3.43248	-3.02515	0.00299297	0.0200265	-2.36663	down
TSPAN7	-0.743749	1.31769	-3.02351	0.00300815	0.0201041	-2.37123	down
LINC00649	-0.557328	1.34202	-3.01705	0.00306864	0.0204322	-2.38934	down
JUP	-0.736706	4.71467	-2.99983	0.00323557	0.0212493	-2.4375	down
MIR770	-0.648661	0.540495	-2.99381	0.00329586	0.0215375	-2.45427	down
RNU6-197P	-0.54215	1.28044	-2.9896	0.00333861	0.0217628	-2.46598	down
TRDJ4	-0.663093	0.922065	-2.98289	0.00340778	0.0221186	-2.4846	down
TRAJ27	-0.563635	1.36124	-2.9637	0.00361322	0.0231885	-2.53773	down
IGLL1	-1.10132	4.6877	-2.95031	0.00376314	0.0239556	-2.57459	down
PRSS57	-0.831832	6.7701	-2.89731	0.00441448	0.0271842	-2.7191	down
TOX	-0.535918	2.61197	-2.88147	0.00462839	0.0281366	-2.76185	down
GLUD1P2	-0.538219	1.1093	-2.87071	0.00477904	0.0288124	-2.79077	down
MIR3609	-0.573798	4.8599	-2.86327	0.00488572	0.0293163	-2.8107	down
SOX4	-0.562158	5.15773	-2.84595	0.00514282	0.0304559	-2.85695	down
CPA3	-1.14866	5.11435	-2.82773	0.00542659	0.0316841	-2.90534	down
LTK	-0.728886	2.34155	-2.82625	0.00545031	0.0317943	-2.90926	down
TESPA1	-0.54129	3.86993	-2.81927	0.00556309	0.0323012	-2.9277	down
SLC28A3	-0.577117	1.07333	-2.81502	0.00563292	0.0326038	-2.93893	down
PALD1	-0.52262	1.90212	-2.8142	0.0056464	0.0326578	-2.94108	down
CRACR2B	-0.570892	2.09024	-2.80692	0.00576798	0.033205	-2.96024	down
SPARC	-0.828688	3.82846	-2.8043	0.00581241	0.0334169	-2.96714	down
DLC1	-0.517936	1.62875	-2.7965	0.00594624	0.0339782	-2.98761	down
SPTA1	-0.61166	2.06604	-2.7856	0.00613808	0.0347818	-3.01614	down
ASS1	-0.520093	0.726955	-2.77319	0.00636331	0.0357804	-3.0485	down
MYO5C	-0.557897	1.93557	-2.75313	0.00674339	0.0373894	-3.10054	down
IGKV2-23	-0.965226	2.13807	-2.75254	0.00675485	0.0374424	-3.10206	down
RPS12P23	-0.640536	2.71797	-2.75075	0.00678986	0.0375994	-3.1067	down
HBB	-1.27364	8.19083	-2.73105	0.00718551	0.0392717	-3.15744	down
CXCL12	-0.928935	2.35587	-2.70416	0.00775943	0.0417673	-3.22618	down
MDFI	-0.649326	1.79898	-2.70368	0.00777009	0.0418171	-3.22741	down
MIR1202	-0.614909	1.79628	-2.69768	0.00790365	0.0424143	-3.24264	down
GPR153	-0.521521	1.35011	-2.66234	0.00873479	0.0458751	-3.33187	down
CD69	-0.643442	5.14328	-2.6473	0.00911174	0.0473626	-3.36951	down
CLIP2	-0.509814	3.80607	-2.62838	0.00960691	0.0493893	-3.41661	down
IGF1R	-0.518394	2.30391	-2.62468	0.0097064	0.0497579	-3.42577	down
CRNDE	-0.672412	2.31974	-2.60146	0.0103532	0.0523454	-3.48309	down
TRGC1	-0.564325	3.15725	-2.59491	0.0105424	0.0530772	-3.49916	down
KCNE5	-0.961775	1.75889	-2.58832	0.010736	0.0538181	-3.5153	down
MAP1A	-0.627517	2.77287	-2.58043	0.0109719	0.0547287	-3.53457	down
PAX5	-0.501331	1.6486	-2.57567	0.0111167	0.0553182	-3.54619	down
NOG	-0.631661	2.11252	-2.57316	0.0111935	0.0555392	-3.55229	down
PTX4	-0.649891	1.54713	-2.56956	0.0113047	0.0559358	-3.56105	down
EVPL	-0.556908	1.44249	-2.55313	0.0118251	0.0579073	-3.60089	down
IGKV1-22	-0.844711	1.93253	-2.55054	0.011909	0.0582458	-3.60714	down
MIR5584	-0.583874	4.84445	-2.53678	0.0123639	0.0599353	-3.64029	down
MPL	-0.680511	3.05831	-2.52059	0.0129188	0.0618567	-3.67905	down
SPNS2	-0.574489	3.75329	-2.50986	0.013299	0.0631553	-3.70464	down
ARMH1	-0.612884	4.80653	-2.48302	0.014294	0.0665889	-3.76821	down
GYPA	-0.604007	1.6274	-2.4573	0.0153093	0.0700936	-3.82853	down
SHANK3	-0.748019	3.09589	-2.45174	0.0155368	0.0708697	-3.84149	down
GUCY1A1	-0.624747	3.55033	-2.42918	0.0164924	0.0742158	-3.89384	down
SLC4A1	-0.84304	3.25028	-2.41239	0.0172367	0.0766905	-3.9325	down
ITGA9	-0.647492	2.61353	-2.40036	0.0177882	0.0784171	-3.96004	down
GABRE	-0.67699	0.820091	-2.38124	0.0186972	0.0812148	-4.00358	down
IPPKP1	-0.594206	2.20133	-2.36674	0.0194135	0.0835266	-4.03637	down
TRGJP1	-0.638988	4.40478	-2.34384	0.0205944	0.0873507	-4.08779	down
ALAS2	-0.8383	3.38743	-2.33393	0.0211248	0.0891096	-4.10991	down
RFX8	-0.651028	3.74919	-2.33211	0.0212233	0.0893816	-4.11395	down
MIR3186	-0.639873	4.89131	-2.32719	0.0214925	0.0902923	-4.1249	down
MMP2	-0.715996	2.62012	-2.30831	0.0225523	0.093711	-4.16668	down
MFAP4	-0.629876	2.4818	-2.30298	0.0228594	0.0945839	-4.1784	down
SHANK1	-0.56887	1.85252	-2.30278	0.0228714	0.0946137	-4.17886	down
PROM1	-0.864967	3.03416	-2.29056	0.0235903	0.0969365	-4.20567	down
HPGDS	-0.78097	2.21187	-2.2839	0.0239902	0.0981071	-4.22021	down
IL17RE	-0.658049	1.71705	-2.27354	0.0246247	0.10006	-4.24279	down
RAMP1	-0.524225	1.16894	-2.24603	0.0263806	0.105602	-4.30225	down
ELANE	-1.12686	6.12583	-2.23535	0.0270915	0.10761	-4.32516	down
NPR3	-0.758654	2.89638	-2.22532	0.0277743	0.109538	-4.34659	down
TRBV12-3	-0.59208	3.31188	-2.22418	0.0278529	0.109727	-4.34902	down
DNTT	-1.074	2.47565	-2.22411	0.0278578	0.109735	-4.34917	down
HBA2	-0.945714	5.76899	-2.14728	0.0336171	0.126312	-4.51019	down
C1QTNF4	-0.704028	3.6647	-2.12379	0.0355715	0.13145	-4.55836	down
AHSP	-0.784436	3.91242	-2.07008	0.0404141	0.144889	-4.66668	down
CLEC5A	-0.597066	2.44949	-2.0466	0.0427018	0.150745	-4.7132	down
MIR3151	-0.564337	1.45568	-2.03634	0.0437363	0.15334	-4.73338	down
LGALS1	1.87854	6.20476	7.88785	1.0x10-12	1.4x10-9	18.4671	up
RHOC	0.727227	2.27244	5.32434	4.2x10-7	2.0x10-5	5.97703	up
SFXN3	1.17818	3.85619	9.09501	1.3x10-15	1.3x10-11	24.9829	up
CSRP1	0.650869	3.01888	9.09393	1.3x10-15	1.3x10-11	24.977	up
CRIP1	1.06966	1.67789	8.82214	6.2x10-15	3.4x10-11	23.489	up
DESI1	0.649435	3.10617	8.58704	2.3x10-14	8.2x10-11	22.2105	up
CD37	0.830058	5.8187	8.55512	2.7x10-14	8.2x10-11	22.0376	up
CISD3	0.519347	1.85604	8.54429	2.9x10-14	8.2x10-11	21.9789	up
LRP10	0.852718	3.87706	8.54296	2.9x10-14	8.2x10-11	21.9717	up
S100A6	1.59348	5.83803	8.51133	3.5x10-14	9.2x10-11	21.8007	up
UNC119	0.830435	2.61258	8.48847	3.9x10-14	9.8x10-11	21.6771	up
DOK2	1.41044	3.56236	8.33164	9.4x10-14	2.1x10-10	20.8321	up
CCND3	0.784055	4.91642	8.09386	3.5x10-13	6.2x10-10	19.5598	up
VSIR	1.52644	5.55518	8.0812	3.7x10-13	6.4x10-10	19.4924	up
CHCHD10	0.881737	2.89404	8.05843	4.2x10-13	6.7x10-10	19.3712	up
RINL	0.658961	2.13976	8.0011	5.8x10-13	8.8x10-10	19.0666	up
EMP3	1.08741	5.87678	7.94699	7.8x10-13	1.1x10-9	18.7798	up
S100A4	1.34385	6.71696	7.85951	1.2x10-12	1.5x10-9	18.3175	up
TNFAIP2	1.73674	4.56536	7.82863	1.4x10-12	1.8x10-9	18.1547	up
GPSM3	0.690885	5.86694	7.74413	2.3x10-12	2.6x10-9	17.7105	up
ABHD11	0.674995	1.91185	7.73513	2.4x10-12	2.6x10-9	17.6633	up
LST1	1.53896	4.49496	7.64498	3.9x10-12	3.7x10-9	17.1915	up
RNPEPL1	0.722259	4.08928	7.57515	5.8x10-12	5.2x10-9	16.8273	up
MVP	0.908158	3.69004	7.5491	6.6x10-12	5.8x10-9	16.6919	up
KCTD17	0.739484	1.46938	7.54103	6.9x10-12	5.9x10-9	16.6499	up
RASGRP4	1.2529	4.2885	7.53829	7.0x10-12	5.9x10-9	16.6357	up
TFEB	0.988195	2.04549	7.50037	8.6x10-12	6.7x10-9	16.4389	up
TICAM1	0.664751	3.30145	7.49474	8.9x10-12	6.7x10-9	16.4097	up
WAS	0.677635	5.725	7.47886	9.7x10-12	7.0x10-9	16.3274	up
SMIM29	0.563199	2.2435	7.38143	1.6x10-11	1.0x10-8	15.8241	up
SH3BGRL3	0.926527	7.46766	7.35486	1.8x10-11	1.1x10-8	15.6873	up
TSPO	1.04088	5.47702	7.33784	2.0x10-11	1.2x10-8	15.5997	up
SHKBP1	0.698323	5.10236	7.30725	2.4x10-11	1.3x10-8	15.4427	up
TMBIM1	0.52658	4.53381	7.3026	2.4x10-11	1.3x10-8	15.4188	up
PEA15	0.682779	4.15971	7.28249	2.7x10-11	1.4x10-8	15.3157	up
OCEL1	0.558533	2.33525	7.2553	3.1x10-11	1.6x10-8	15.1764	up
TFE3	0.575656	4.03236	7.2195	3.8x10-11	1.8x10-8	14.9935	up
ACP2	0.605785	2.90962	7.21479	3.9x10-11	1.8x10-8	14.9694	up
PPM1M	0.838036	3.27905	7.1998	4.2x10-11	2.0x10-8	14.8929	up
OGFR	0.589597	3.78001	7.19127	4.4x10-11	2.0x10-8	14.8494	up
PDLIM2	0.606731	1.92875	7.19049	4.4x10-11	2.0x10-8	14.8455	up
SELPLG	1.00534	5.96161	7.18877	4.5x10-11	2.0x10-8	14.8367	up
COMTD1	0.668428	1.69833	7.18171	4.6x10-11	2.0x10-8	14.8007	up
KCNQ1	1.19226	2.01852	7.18132	4.6x10-11	2.0x10-8	14.7987	up
ZNF385A	1.22042	4.08442	7.16621	5.0x10-11	2.1x10-8	14.7218	up
RGS19	0.754984	5.10607	7.16105	5.2x10-11	2.2x10-8	14.6955	up
ITPK1	0.586651	3.51475	7.15831	5.2x10-11	2.2x10-8	14.6816	up
JPH4	0.529752	0.702702	7.14998	5.5x10-11	2.2x10-8	14.6392	up
VDR	1.11085	1.83522	7.1377	5.8x10-11	2.3x10-8	14.5768	up
PMM1	0.534748	1.09175	7.12113	6.4x10-11	2.5x10-8	14.4927	up
PRKACA	0.607972	3.32745	7.09162	7.4x10-11	2.9x10-8	14.343	up
EFHD2	0.831477	5.88189	7.0661	8.5x10-11	3.2x10-8	14.2138	up
PTPN6	0.760393	5.75219	7.05281	9.1x10-11	3.4x10-8	14.1466	up
CFL1	0.562509	6.69684	7.02869	1.0x10-10	3.7x10-8	14.0248	up
DEDD2	0.577419	3.66739	7.01514	1.1x10-10	3.8x10-8	13.9564	up
CD300C	1.57829	2.93263	6.94606	1.5x10-10	5.3x10-8	13.6088	up
LAMTOR2	0.550586	3.46466	6.94281	1.6x10-10	5.4x10-8	13.5925	up
LFNG	1.17862	2.91012	6.93673	1.6x10-10	5.5x10-8	13.5619	up
LILRB2	1.91672	3.0706	6.90375	1.9x10-10	6.2x10-8	13.3967	up
DNASE1L1	0.522295	2.73651	6.89822	2.0x10-10	6.3x10-8	13.369	up
CBR1	0.836262	2.48904	6.8951	2.0x10-10	6.3x10-8	13.3533	up
FGR	1.96927	4.81389	6.8609	2.4x10-10	7.3x10-8	13.1824	up
TNFSF13	0.811982	2.76532	6.8525	2.5x10-10	7.5x10-8	13.1405	up
ITGAX	1.51002	4.16702	6.84572	2.6x10-10	7.8x10-8	13.1066	up
TGFB1	0.766983	6.23777	6.83537	2.8x10-10	8.1x10-8	13.055	up
JOSD2	0.534922	2.36658	6.82371	2.9x10-10	8.6x10-8	12.9969	up
SGMS2	1.19196	1.50527	6.81826	3.0x10-10	8.7x10-8	12.9698	up
CD300LB	1.53938	2.18622	6.80853	3.2x10-10	9.0x10-8	12.9214	up
VASP	0.660171	4.99369	6.7751	3.8x10-10	1.0x10-7	12.7553	up
PRDX5	0.553318	5.5241	6.7711	3.9x10-10	1.0x10-7	12.7354	up
CSK	0.542463	5.08912	6.73213	4.7x10-10	1.2x10-7	12.5423	up
TAGLN2	0.726464	7.41656	6.70801	5.4x10-10	1.3x10-7	12.4231	up
HOXB2	1.54805	2.13644	6.67983	6.2x10-10	1.5x10-7	12.284	up
MOB3A	0.648845	5.2371	6.67806	6.3x10-10	1.5x10-7	12.2753	up
PTPN18	0.662373	4.76223	6.66474	6.7x10-10	1.5x10-7	12.2097	up
OAZ1	0.524967	6.48308	6.64508	7.4x10-10	1.7x10-7	12.1129	up
METTL7B	1.49496	2.05337	6.6389	7.6x10-10	1.7x10-7	12.0825	up
BLOC1S1	0.555845	3.46479	6.63225	7.9x10-10	1.8x10-7	12.0498	up
TNFRSF1B	1.64565	4.6879	6.59061	9.8x10-10	2.1x10-7	11.8456	up
CTSD	1.12904	6.51074	6.58486	1.0x10-9	2.1x10-7	11.8174	up
LILRA1	1.55925	2.87889	6.58125	1.0x10-9	2.1x10-7	11.7997	up
RRAS	1.02471	3.07998	6.56218	1.1x10-9	2.3x10-7	11.7065	up
PLD3	0.939132	4.63352	6.5546	1.1x10-9	2.4x10-7	11.6694	up
PPP1R18	0.72102	5.02589	6.54991	1.2x10-9	2.4x10-7	11.6465	up
CD4	1.41341	4.32894	6.52694	1.3x10-9	2.6x10-7	11.5345	up
STK32C	0.611973	1.75645	6.51498	1.4x10-9	2.8x10-7	11.4762	up
GRINA	0.712151	5.40592	6.50513	1.5x10-9	2.9x10-7	11.4282	up
RAC2	0.547585	7.07558	6.46919	1.8x10-9	3.4x10-7	11.2536	up
SHISA5	0.500358	4.4796	6.4564	1.9x10-9	3.5x10-7	11.1916	up
CUEDC1	0.756825	1.17392	6.43851	2.1x10-9	3.8x10-7	11.1049	up
B4GALT1	0.51463	4.40275	6.4353	2.1x10-9	3.8x10-7	11.0894	up
UNC93B1	0.923506	4.05184	6.39726	2.5x10-9	4.6x10-7	10.9056	up
NCF1C	1.4798	2.43572	6.39641	2.6x10-9	4.6x10-7	10.9015	up
CCDC88B	0.934882	3.79795	6.39107	2.6x10-9	4.7x10-7	10.8757	up
CAPNS1	0.502108	6.08043	6.38369	2.7x10-9	4.8x10-7	10.8401	up
ZBTB7B	0.946691	4.0103	6.38344	2.7x10-9	4.8x10-7	10.8389	up
PLEKHO2	0.605113	3.9801	6.34566	3.3x10-9	5.5x10-7	10.6571	up
G6PD	0.686346	4.69323	6.33317	3.5x10-9	5.8x10-7	10.5971	up
TNFSF12	1.01235	1.96592	6.33218	3.5x10-9	5.8x10-7	10.5924	up
PRKCD	0.981459	5.34746	6.32235	3.7x10-9	6.0x10-7	10.5452	up
CX3CR1	1.88414	3.58748	6.32209	3.7x10-9	6.0x10-7	10.544	up
KLF2	1.211	5.48409	6.31728	3.8x10-9	6.1x10-7	10.5209	up
BASP1	1.63965	3.12775	6.31582	3.8x10-9	6.1x10-7	10.5139	up
CDC42SE1	0.546784	5.3927	6.29988	4.2x10-9	6.5x10-7	10.4376	up
ADAP1	0.793473	2.12292	6.29841	4.2x10-9	6.5x10-7	10.4305	up
EHBP1L1	0.705416	4.71014	6.28611	4.5x10-9	6.8x10-7	10.3717	up
PDLIM7	0.709945	3.42546	6.26703	4.9x10-9	7.4x10-7	10.2806	up
PDE2A-AS2	0.57399	0.715757	6.26688	4.9x10-9	7.4x10-7	10.2798	up
RHOG	0.640856	6.4297	6.24983	5.3x10-9	7.9x10-7	10.1985	up
SIGLEC16	0.85556	1.09941	6.24861	5.4x10-9	7.9x10-7	10.1927	up
PFN1	0.560522	8.24116	6.24177	5.5x10-9	8.1x10-7	10.1601	up
COTL1	1.06346	4.89943	6.23737	5.7x10-9	8.3x10-7	10.1391	up
SERTAD1	0.538381	1.73981	6.22029	6.2x10-9	8.9x10-7	10.0579	up
CSTB	0.679479	3.72988	6.20889	6.5x10-9	9.3x10-7	10.0037	up
GPR35	0.668126	1.49363	6.2042	6.7x10-9	9.5x10-7	9.98143	up
HK3	1.96842	3.10125	6.17735	7.6x10-9	1.0x10-6	9.85411	up
TEDC1	0.606605	1.65429	6.16763	8.0x10-9	1.0x10-6	9.80809	up
PLEC	1.06341	4.42912	6.16591	8.1x10-9	1.0x10-6	9.79995	up
SORT1	1.52851	2.43915	6.16305	8.2x10-9	1.0x10-6	9.78642	up
RENBP	0.746445	2.91777	6.15912	8.3x10-9	1.1x10-6	9.76781	up
ANXA5	1.63148	3.91129	6.15708	8.4x10-9	1.1x10-6	9.75818	up
PYCARD	0.730807	4.32614	6.1514	8.7x10-9	1.1x10-6	9.73132	up
NCF1	1.45241	2.31778	6.14897	8.8x10-9	1.1x10-6	9.71984	up
NINJ1	1.02719	3.16203	6.14876	8.8x10-9	1.1x10-6	9.71885	up
LMNA	1.40593	3.39857	6.14769	8.8x10-9	1.1x10-6	9.71379	up
TWF2	0.53967	4.6321	6.14472	9.0x10-9	1.1x10-6	9.69977	up
CEBPB	1.14102	4.00581	6.14247	9.1x10-9	1.1x10-6	9.68917	up
AIF1	0.900313	6.33959	6.14046	9.2x10-9	1.1x10-6	9.67965	up
MAFB	1.90036	2.64926	6.1289	9.7x10-9	1.2x10-6	9.6251	up
UCP2	0.685661	6.17662	6.12282	1.0x10-8	1.2x10-6	9.59646	up
MAPK7	0.631901	2.10728	6.12019	1.0x10-8	1.2x10-6	9.58403	up
MCOLN1	0.60586	2.85094	6.11944	1.0x10-8	1.2x10-6	9.58053	up
ITGB2-AS1	1.28402	2.7508	6.09232	1.1x10-8	1.3x10-6	9.45285	up
SH3TC1	0.984399	2.5073	6.08954	1.1x10-8	1.3x10-6	9.43979	up
MARCHF2	0.570028	3.25459	6.08711	1.1x10-8	1.3x10-6	9.4284	up
FRAT2	0.656129	3.7906	6.07808	1.2x10-8	1.4x10-6	9.38596	up
LRRC25	1.62545	3.29012	6.06613	1.3x10-8	1.4x10-6	9.3299	up
PKM	0.671356	6.16193	6.06003	1.3x10-8	1.5x10-6	9.30128	up
CFP	1.17909	4.02238	6.05965	1.3x10-8	1.5x10-6	9.29952	up
FRAT1	0.669756	2.91466	6.0546	1.4x10-8	1.5x10-6	9.27584	up
ARHGAP30	0.555191	5.41258	6.04865	1.4x10-8	1.5x10-6	9.248	up
SPI1	0.73966	6.31065	6.04768	1.4x10-8	1.5x10-6	9.24342	up
IL1RN	1.26856	2.01298	6.02913	1.5x10-8	1.7x10-6	9.15666	up
NLRP12	1.35142	1.97743	6.00535	1.7x10-8	1.8x10-6	9.04563	up
PTAFR	1.44356	3.58437	5.99675	1.8x10-8	1.9x10-6	9.00554	up
GPR132	0.8164	2.5756	5.98446	1.9x10-8	2.0x10-6	8.9483	up
CTSZ	0.924423	5.83896	5.98153	1.9x10-8	2.0x10-6	8.9347	up
FTL	0.733024	9.94035	5.97649	2.0x10-8	2.0x10-6	8.91124	up
MYO7A	0.751911	0.711307	5.95536	2.2x10-8	2.2x10-6	8.81304	up
SLC15A3	1.13563	1.5849	5.95506	2.2x10-8	2.2x10-6	8.81165	up
IGF2R	1.17292	2.6052	5.9532	2.2x10-8	2.2x10-6	8.80303	up
PRELID1	0.522147	3.7006	5.94055	2.4x10-8	2.3x10-6	8.74435	up
SLC43A2	1.01512	2.18039	5.94005	2.4x10-8	2.3x10-6	8.74205	up
FTH1	0.786627	6.4411	5.93113	2.5x10-8	2.4x10-6	8.70071	up
HOXB-AS1	1.03518	1.57294	5.91848	2.6x10-8	2.5x10-6	8.64218	up
LINC00482	1.02648	0.941988	5.91263	2.7x10-8	2.6x10-6	8.61513	up
ALOX5AP	1.47406	4.29171	5.90179	2.9x10-8	2.7x10-6	8.56505	up
CPNE8	1.47413	2.33677	5.88765	3.1x10-8	2.8x10-6	8.49979	up
ZNF296	0.528489	2.25994	5.88514	3.1x10-8	2.8x10-6	8.48822	up
ADAM8	1.18261	3.85919	5.88144	3.2x10-8	2.9x10-6	8.47117	up
TREML2	0.810968	2.14533	5.86652	3.4x10-8	3.1x10-6	8.40246	up
SLC66A1	0.5548	3.11284	5.85936	3.5x10-8	3.1x10-6	8.36948	up
LDLR	0.912788	2.70676	5.85662	3.6x10-8	3.2x10-6	8.35689	up
STXBP2	0.637148	3.97579	5.82924	4.1x10-8	3.5x10-6	8.23119	up
UBXN11	0.845147	3.68026	5.8257	4.1x10-8	3.6x10-6	8.21497	up
RGS14	0.701215	3.86364	5.82184	4.2x10-8	3.6x10-6	8.19728	up
ITGB2	1.22716	6.01465	5.81829	4.3x10-8	3.7x10-6	8.18099	up
HOXA3	1.46186	1.84573	5.81589	4.3x10-8	3.7x10-6	8.17003	up
MSRB1	0.814592	3.80893	5.81184	4.4x10-8	3.7x10-6	8.15146	up
SSBP4	0.588155	3.92608	5.80904	4.5x10-8	3.8x10-6	8.13865	up
KLF4	1.59572	3.59433	5.80669	4.5x10-8	3.8x10-6	8.12791	up
RALB	0.506748	4.50413	5.80639	4.5x10-8	3.8x10-6	8.12653	up
LINC01503	0.674921	0.982103	5.80547	4.6x10-8	3.8x10-6	8.12234	up
NRGN	1.44362	4.33337	5.8014	4.7x10-8	3.9x10-6	8.10374	up
ZNF503	0.958267	1.41713	5.79499	4.8x10-8	3.9x10-6	8.07443	up
NPC2	0.640989	4.64947	5.78757	5.0x10-8	4.1x10-6	8.04054	up
PELATON	1.4751	1.92084	5.78542	5.0x10-8	4.1x10-6	8.0307	up
CD1D	1.55395	2.46437	5.78481	5.0x10-8	4.1x10-6	8.02794	up
NCF1B	1.21802	1.98423	5.78246	5.1x10-8	4.1x10-6	8.01719	up
PPDPF	0.799806	5.41174	5.77784	5.2x10-8	4.2x10-6	7.99612	up
HOXA5	2.07331	2.80501	5.77543	5.3x10-8	4.3x10-6	7.98511	up
ARAP1	0.670511	4.58309	5.77074	5.4x10-8	4.3x10-6	7.96374	up
PNPLA6	0.625483	3.76442	5.76896	5.4x10-8	4.4x10-6	7.95562	up
AFTPH-DT	0.578613	1.56674	5.76721	5.5x10-8	4.4x10-6	7.94767	up
NADK	0.653391	4.16827	5.76529	5.5x10-8	4.4x10-6	7.93891	up
MGST2	0.522405	3.40467	5.76351	5.6x10-8	4.4x10-6	7.93081	up
TNNI2	0.930084	1.37631	5.76238	5.6x10-8	4.4x10-6	7.92565	up
ARPC1B	0.685972	5.52271	5.76051	5.7x10-8	4.5x10-6	7.91713	up
HIGD2A	0.541184	5.48347	5.7603	5.7x10-8	4.5x10-6	7.91616	up
TBC1D2	0.72876	3.36496	5.75046	5.9x10-8	4.6x10-6	7.87141	up
VNN1	1.68816	2.73492	5.74053	6.2x10-8	4.8x10-6	7.82624	up
TNS3	1.01893	3.2556	5.73329	6.4x10-8	4.9x10-6	7.79335	up
MEFV	1.41529	1.9748	5.7257	6.7x10-8	5.1x10-6	7.75892	up
NUDT14	0.652269	1.43728	5.72265	6.8x10-8	5.1x10-6	7.7451	up
ACOT9	0.532567	2.87886	5.71418	7.1x10-8	5.3x10-6	7.7067	up
MYADM	0.735519	6.61187	5.70566	7.3x10-8	5.5x10-6	7.6681	up
FERMT3	0.568995	6.07763	5.70352	7.4x10-8	5.5x10-6	7.65838	up
SCIMP	1.32392	2.50458	5.70243	7.5x10-8	5.5x10-6	7.65347	up
RIPK3	0.556732	2.73876	5.69884	7.6x10-8	5.6x10-6	7.63723	up
RXRA	0.902925	2.78548	5.69385	7.8x10-8	5.7x10-6	7.61464	up
CARD16	0.729538	2.68801	5.69167	7.8x10-8	5.7x10-6	7.60479	up
LINC00877	0.663982	0.99596	5.67413	8.5x10-8	6.1x10-6	7.52556	up
ARHGEF10L	1.05944	1.24176	5.66419	8.9x10-8	6.3x10-6	7.48073	up
MEIS1	1.51675	2.32903	5.65198	9.5x10-8	6.6x10-6	7.42571	up
C1orf162	1.06094	4.46473	5.63901	1.0x10-7	6.9x10-6	7.36735	up
SDSL	0.70263	1.93702	5.63716	1.0x10-7	7.0x10-6	7.35904	up
F12	0.587821	0.897295	5.63566	1.0x10-7	7.0x10-6	7.35229	up
NAGA	0.830498	4.4046	5.63011	1.0x10-7	7.1x10-6	7.32738	up
SECTM1	1.30333	1.84825	5.62697	1.0x10-7	7.2x10-6	7.31329	up
HOXA9	1.95001	3.02063	5.61393	1.1x10-7	7.6x10-6	7.25476	up
TYMP	1.27603	3.84413	5.6115	1.1x10-7	7.6x10-6	7.24386	up
TOR4A	0.570575	3.61472	5.61123	1.1x10-7	7.6x10-6	7.24266	up
IL4I1	0.544513	0.672348	5.59973	1.2x10-7	8.0x10-6	7.19114	up
ARHGAP45	0.682234	5.34611	5.58636	1.2x10-7	8.4x10-6	7.13134	up
CDA	1.63156	3.17217	5.58569	1.2x10-7	8.4x10-6	7.12831	up
PEPD	0.514579	3.06584	5.58266	1.3x10-7	8.4x10-6	7.11477	up
LILRA6	1.21464	1.65156	5.57983	1.3x10-7	8.5x10-6	7.10214	up
SLC16A13	0.507015	1.68629	5.57552	1.3x10-7	8.7x10-6	7.08288	up
SH2B3	0.527711	4.82959	5.57372	1.3x10-7	8.7x10-6	7.07484	up
KCNE1	0.80289	1.00878	5.57291	1.3x10-7	8.7x10-6	7.07123	up
LINC00963	0.605239	2.27783	5.56609	1.4x10-7	9.0x10-6	7.0408	up
FGD2	1.27471	2.42856	5.55842	1.4x10-7	9.2x10-6	7.00662	up
GLIPR2	0.914187	4.31259	5.55769	1.4x10-7	9.2x10-6	7.00338	up
CES4A	0.570243	0.802117	5.54617	1.5x10-7	9.6x10-6	6.95203	up
ARHGAP27	0.586543	3.67296	5.54457	1.5x10-7	9.7x10-6	6.94491	up
TUBA4A	1.01165	2.98013	5.53965	1.6x10-7	9.8x10-6	6.92305	up
TCIRG1	0.910766	5.27731	5.53336	1.6x10-7	1.0x10-5	6.89509	up
S100A11	1.2017	6.62225	5.52137	1.7x10-7	1.0x10-5	6.84182	up
ATP6V0D1	0.550466	3.55618	5.51368	1.8x10-7	1.0x10-5	6.80772	up
SMCO4	0.885902	2.78354	5.51338	1.8x10-7	1.0x10-5	6.80637	up
TTYH3	0.759902	4.3375	5.50817	1.8x10-7	1.1x10-5	6.78325	up
BST2	0.792998	5.58727	5.50478	1.8x10-7	1.1x10-5	6.76824	up
CDC42EP3	0.988481	2.94463	5.50462	1.8x10-7	1.1x10-5	6.76754	up
CACNB1	0.641686	1.65989	5.49644	1.9x10-7	1.1x10-5	6.7313	up
POU2F2	1.07724	3.85087	5.49419	1.9x10-7	1.1x10-5	6.72135	up
ABCD1	0.583811	3.03422	5.48831	2.0x10-7	1.1x10-5	6.69535	up
IFI27L2	0.669698	2.25551	5.48703	2.0x10-7	1.1x10-5	6.68971	up
ATP6V0E2	0.577709	1.63116	5.48344	2.0x10-7	1.1x10-5	6.67381	up
MFSD2A	0.711014	1.50828	5.47546	2.1x10-7	1.2x10-5	6.63857	up
VSIG2	0.912712	1.88768	5.46818	2.2x10-7	1.2x10-5	6.60642	up
MANSC1	0.605871	1.00841	5.46802	2.2x10-7	1.2x10-5	6.60572	up
LILRB3	1.17805	2.45006	5.45626	2.3x10-7	1.3x10-5	6.55389	up
FXYD6	0.818019	1.00735	5.43469	2.6x10-7	1.4x10-5	6.45893	up
HOXA10	1.42028	2.19447	5.43381	2.6x10-7	1.4x10-5	6.45508	up
C1orf54	0.515025	1.81879	5.43349	2.6x10-7	1.4x10-5	6.45369	up
C19orf38	1.10415	3.39203	5.42333	2.7x10-7	1.4x10-5	6.40903	up
TMEM205	0.567307	4.01277	5.42155	2.7x10-7	1.4x10-5	6.40122	up
OAS1	0.939788	2.53493	5.41861	2.7x10-7	1.4x10-5	6.38832	up
FCER1G	1.45437	6.04495	5.4178	2.8x10-7	1.4x10-5	6.38477	up
LILRB1	1.18832	2.28829	5.41222	2.8x10-7	1.5x10-5	6.36032	up
IRF2BPL	0.517406	2.80381	5.40995	2.9x10-7	1.5x10-5	6.35035	up
RHBDF2	0.76278	3.37084	5.40531	2.9x10-7	1.5x10-5	6.33005	up
CCDC69	0.577877	4.3094	5.40474	2.9x10-7	1.5x10-5	6.32754	up
SLC49A3	0.680935	1.74142	5.40217	3.0x10-7	1.5x10-5	6.31629	up
PTK6	0.539155	1.32615	5.39835	3.0x10-7	1.5x10-5	6.29955	up
ABI3	1.00508	2.14935	5.39731	3.0x10-7	1.5x10-5	6.29503	up
NRBP2	0.731544	1.60509	5.392	3.1x10-7	1.6x10-5	6.2718	up
PLBD2	0.628789	3.60984	5.38984	3.1x10-7	1.6x10-5	6.26233	up
GMIP	0.514992	5.17403	5.38427	3.2x10-7	1.6x10-5	6.23799	up
PLPPR2	0.690253	3.31067	5.38225	3.3x10-7	1.6x10-5	6.22916	up
RARG	0.533125	1.45279	5.38067	3.3x10-7	1.6x10-5	6.22225	up
C5AR1	1.73309	3.22151	5.37646	3.3x10-7	1.7x10-5	6.20389	up
PDZD7	0.523987	0.7794	5.37052	3.4x10-7	1.7x10-5	6.17794	up
GRK6	0.526467	4.55711	5.36937	3.5x10-7	1.7x10-5	6.17294	up
EHD4	0.671885	2.00435	5.36742	3.5x10-7	1.7x10-5	6.16445	up
GALM	0.665839	1.73445	5.36362	3.5x10-7	1.8x10-5	6.14785	up
SH3BP2	0.654581	3.93696	5.3627	3.6x10-7	1.8x10-5	6.14387	up
HNMT	1.10785	1.39935	5.3626	3.6x10-7	1.8x10-5	6.14344	up
LILRB4	1.3809	1.86081	5.35896	3.6x10-7	1.8x10-5	6.12757	up
LINC01220	0.723573	1.19962	5.3569	3.7x10-7	1.8x10-5	6.11858	up
RELL2	0.588404	1.33105	5.3516	3.7x10-7	1.8x10-5	6.09548	up
SLC22A18	0.555841	1.6069	5.34343	3.9x10-7	1.9x10-5	6.05998	up
HOXB4	1.38403	2.07652	5.33587	4.0x10-7	1.9x10-5	6.0271	up
CHP1P2	0.679424	1.1489	5.33575	4.0x10-7	1.9x10-5	6.02657	up
SNN	0.591477	3.22173	5.32261	4.3x10-7	2.1x10-5	5.96955	up
RAB24	0.598786	2.80164	5.3204	4.3x10-7	2.1x10-5	5.95997	up
PBX3	1.26695	3.53551	5.31788	4.4x10-7	2.1x10-5	5.94902	up
CD52	1.43863	5.55958	5.31413	4.4x10-7	2.1x10-5	5.93277	up
GPBAR1	0.953432	1.61452	5.30286	4.7x10-7	2.2x10-5	5.88397	up
KCNMB1	0.630589	1.18631	5.28649	5.0x10-7	2.3x10-5	5.81321	up
HOXA7	1.00684	1.2934	5.28431	5.1x10-7	2.4x10-5	5.80376	up
CLEC7A	1.49825	2.61814	5.27959	5.2x10-7	2.4x10-5	5.78341	up
COX8A	0.53008	6.22541	5.27043	5.4x10-7	2.5x10-5	5.74389	up
BCL2L11	0.653091	2.18357	5.2693	5.4x10-7	2.5x10-5	5.73905	up
RARA	0.629242	3.59995	5.26275	5.6x10-7	2.5x10-5	5.71079	up
NCF2	1.38468	4.71372	5.25628	5.8x10-7	2.6x10-5	5.68294	up
RTN2	0.647273	1.4282	5.24944	6.0x10-7	2.6x10-5	5.65355	up
SERINC2	0.891218	1.13882	5.23543	6.3x10-7	2.8x10-5	5.59335	up
STARD8	0.822262	2.23674	5.22255	6.7x10-7	2.9x10-5	5.53812	up
HOXA6	1.62759	2.21326	5.22057	6.8x10-7	3.0x10-5	5.52962	up
CAPN2	0.851694	3.76004	5.21987	6.8x10-7	3.0x10-5	5.52664	up
MYOF	1.17343	1.80671	5.21266	7.0x10-7	3.0x10-5	5.49575	up
RNA5SP207	0.665211	0.85076	5.21082	7.1x10-7	3.0x10-5	5.4879	up
ADAM15	0.584712	4.22552	5.20571	7.3x10-7	3.1x10-5	5.46602	up
TYROBP	1.11273	6.91145	5.19353	7.7x10-7	3.2x10-5	5.41397	up
ITGAM	1.28598	4.13088	5.1882	7.8x10-7	3.3x10-5	5.39125	up
AGTRAP	0.813976	4.22134	5.18173	8.1x10-7	3.3x10-5	5.36363	up
MIRLET7BHG	0.802215	2.13373	5.17228	8.4x10-7	3.5x10-5	5.32339	up
NACC2	0.858408	2.3193	5.16594	8.7x10-7	3.5x10-5	5.2964	up
LINC02975	0.890662	1.23256	5.16208	8.8x10-7	3.6x10-5	5.27996	up
HOXA4	1.05954	1.39334	5.16106	8.9x10-7	3.6x10-5	5.27565	up
TNFRSF8	0.541776	0.794119	5.15621	9.1x10-7	3.6x10-5	5.255	up
HSPA7	1.19264	1.57393	5.14324	9.6x10-7	3.8x10-5	5.19995	up
FLOT1	0.76417	4.09993	5.14241	9.6x10-7	3.8x10-5	5.19642	up
GPX1	0.679807	7.38651	5.14213	9.6x10-7	3.8x10-5	5.19525	up
ARHGEF1	0.506642	5.26762	5.12746	1.0x10-6	4.0x10-5	5.13309	up
SIRPA	0.78349	4.26049	5.1229	1.0x10-6	4.1x10-5	5.11376	up
CYTH4	1.02689	4.05836	5.12118	1.0x10-6	4.1x10-5	5.1065	up
HMOX1	1.27166	2.5974	5.12038	1.0x10-6	4.1x10-5	5.10309	up
SIGLEC7	0.952124	1.49834	5.11847	1.0x10-6	4.1x10-5	5.09502	up
SLC11A1	1.41258	2.50178	5.11463	1.0x10-6	4.2x10-5	5.0788	up
HOXB5	1.25844	1.41362	5.1124	1.1x10-6	4.2x10-5	5.06939	up
HNRNPLL	0.841634	1.80393	5.11206	1.1x10-6	4.2x10-5	5.06795	up
SHTN1	0.877686	1.07174	5.11122	1.1x10-6	4.2x10-5	5.0644	up
SRC	0.803136	1.98088	5.11003	1.1x10-6	4.2x10-5	5.05936	up
HSPA6	0.644536	0.973896	5.10318	1.1x10-6	4.3x10-5	5.03044	up
HOXB3	1.63168	2.57491	5.09954	1.1x10-6	4.4x10-5	5.01509	up
ITGB7	0.862725	2.93138	5.09761	1.1x10-6	4.4x10-5	5.00692	up
MYO1F	0.676078	5.43157	5.09508	1.1x10-6	4.4x10-5	4.99626	up
GGT1	0.730756	1.90599	5.09002	1.2x10-6	4.5x10-5	4.97493	up
HOXB6	1.3213	1.38929	5.0888	1.2x10-6	4.5x10-5	4.9698	up
NAPSB	1.37595	2.72668	5.0868	1.2x10-6	4.6x10-5	4.96137	up
RAB3D	0.639584	4.28257	5.06645	1.3x10-6	4.9x10-5	4.87579	up
LILRA5	1.53548	2.38465	5.06537	1.3x10-6	4.9x10-5	4.87123	up
IQSEC2	0.6831	1.74162	5.05713	1.4x10-6	5.1x10-5	4.83666	up
MPP7	0.774661	1.86968	5.05017	1.4x10-6	5.2x10-5	4.80745	up
SLC12A9	0.638037	2.96673	5.05002	1.4x10-6	5.2x10-5	4.80684	up
UBTD1	0.630233	2.04262	5.03986	1.5x10-6	5.4x10-5	4.7643	up
HOXA10-AS	1.07047	1.7251	5.03968	1.5x10-6	5.4x10-5	4.76354	up
CD300A	0.921049	3.79875	5.03667	1.5x10-6	5.4x10-5	4.75093	up
FTLP3	0.624852	3.33097	5.02959	1.5x10-6	5.6x10-5	4.72134	up
SLC16A3	0.712418	2.92362	5.02669	1.6x10-6	5.6x10-5	4.70923	up
MIR6753	0.634176	2.09052	5.02527	1.6x10-6	5.6x10-5	4.70328	up
STAC3	0.631776	3.29376	5.02187	1.6x10-6	5.7x10-5	4.68907	up
CD14	1.94642	3.48498	5.01993	1.6x10-6	5.7x10-5	4.68096	up
CDKN2D	0.676732	3.57092	5.01784	1.6x10-6	5.8x10-5	4.67224	up
MPEG1	2.04711	4.68231	5.01674	1.6x10-6	5.8x10-5	4.66767	up
RN7SL138P	1.04938	1.94019	5.01343	1.7x10-6	5.9x10-5	4.65386	up
CCR1	1.3297	3.05589	5.01026	1.7x10-6	5.9x10-5	4.64063	up
ITGAL	0.889482	5.33191	4.99002	1.8x10-6	6.4x10-5	4.55636	up
CCL23	1.25277	1.77452	4.98591	1.9x10-6	6.5x10-5	4.5393	up
B3GNT8	0.617877	2.85005	4.97776	1.9x10-6	6.6x10-5	4.50544	up
PPARD	0.6021	2.11112	4.97733	1.9x10-6	6.6x10-5	4.50365	up
IFI30	0.88116	1.31938	4.97599	2.0x10-6	6.6x10-5	4.49807	up
SIGLEC9	1.2742	2.27434	4.97172	2.0x10-6	6.8x10-5	4.48036	up
SLC37A2	0.870375	1.62909	4.971	2.0x10-6	6.8x10-5	4.4774	up
RUSC2	0.69981	3.10591	4.96475	2.1x10-6	6.9x10-5	4.45148	up
PLOD1	0.534262	3.4881	4.96081	2.1x10-6	7.0x10-5	4.43514	up
HTR7	0.698932	0.812165	4.95639	2.1x10-6	7.1x10-5	4.41687	up
ADAP2	1.05628	2.15422	4.95584	2.1x10-6	7.1x10-5	4.41456	up
RAB29	0.556949	2.88983	4.94947	2.2x10-6	7.3x10-5	4.38824	up
CD300E	1.75274	2.44414	4.94607	2.2x10-6	7.4x10-5	4.37419	up
ETS2	0.650838	5.00364	4.94549	2.2x10-6	7.4x10-5	4.37179	up
CES1	1.38076	1.23879	4.9368	2.3x10-6	7.6x10-5	4.33588	up
PLA2G4A	0.842106	2.91565	4.92584	2.4x10-6	8.0x10-5	4.29068	up
SIRPB1	1.29963	2.72471	4.92374	2.5x10-6	8.0x10-5	4.28204	up
PAQR8	0.625783	2.55482	4.92095	2.5x10-6	8.1x10-5	4.27054	up
KCNC3	0.637659	0.789613	4.92092	2.5x10-6	8.1x10-5	4.27043	up
CARD8-AS1	0.501819	2.94793	4.91256	2.6x10-6	8.3x10-5	4.23599	up
DPEP2	0.580049	3.94771	4.91033	2.6x10-6	8.3x10-5	4.22685	up
HIP1	0.817522	3.42504	4.9037	2.7x10-6	8.5x10-5	4.19957	up
LINC00899	0.914035	1.6758	4.89982	2.7x10-6	8.6x10-5	4.18363	up
CCL3	0.716075	1.54776	4.88801	2.9x10-6	9.0x10-5	4.13517	up
NFKB2	0.635691	3.02393	4.8861	2.9x10-6	9.1x10-5	4.12733	up
SLC7A7	1.22614	2.6712	4.88496	2.9x10-6	9.1x10-5	4.12269	up
CSF2RA	0.894047	3.73023	4.86719	3.2x10-6	9.7x10-5	4.04993	up
CHST15	1.15937	2.10289	4.86086	3.2x10-6	9.9x10-5	4.02408	up
ATP13A2	0.601247	3.41657	4.85927	3.3x10-6	9.9x10-5	4.01759	up
CST3	1.31517	5.3817	4.8573	3.3x10-6	0.000100082	4.00956	up
IRF5	0.628147	4.37385	4.85052	3.4x10-6	0.000102532	3.98187	up
PARVB	0.503162	3.05465	4.84658	3.5x10-6	0.000103905	3.96582	up
VAV2	0.665417	2.34323	4.84625	3.5x10-6	0.000103972	3.96449	up
SIPA1	0.572092	5.13442	4.84502	3.5x10-6	0.000104364	3.95946	up
KIAA0513	0.846158	2.18153	4.84411	3.5x10-6	0.000104612	3.95576	up
TLR8	1.45599	2.29395	4.8406	3.5x10-6	0.000106031	3.94147	up
HOTAIRM1	0.738015	1.92283	4.83492	3.6x10-6	0.000108224	3.91835	up
FLNA	0.60906	7.11926	4.82737	3.8x10-6	0.000110544	3.88764	up
TMEM105	0.686034	0.64007	4.82577	3.8x10-6	0.000110842	3.88113	up
ITGA7	0.755677	1.45455	4.81246	4.0x10-6	0.000115798	3.82709	up
FTH1P8	0.513507	1.35912	4.80905	4.1x10-6	0.000117063	3.81326	up
CYBA	0.556888	6.10087	4.80784	4.1x10-6	0.000117334	3.80834	up
SLC2A9	0.605938	1.59461	4.80097	4.2x10-6	0.000119823	3.78052	up
TRIM8	0.518218	4.79029	4.80017	4.2x10-6	0.000119998	3.77729	up
FFAR2	0.685255	0.97611	4.78599	4.5x10-6	0.000125994	3.71993	up
JAML	1.24444	2.91433	4.78126	4.6x10-6	0.000128179	3.70084	up
ZYX	0.570305	6.84044	4.78055	4.6x10-6	0.000128477	3.69796	up
HELZ2	0.682395	2.14861	4.7795	4.6x10-6	0.000128955	3.69374	up
SNX10	0.867728	3.56918	4.77831	4.6x10-6	0.000129519	3.6889	up
FBP1	1.23571	2.66818	4.77728	4.7x10-6	0.000129807	3.68478	up
SH3BP1	0.597016	4.06134	4.76694	4.9x10-6	0.000134479	3.64306	up
APOBR	0.77544	4.21986	4.76418	4.9x10-6	0.000135491	3.63195	up
LAPTM5	0.607746	8.15878	4.75753	5.1x10-6	0.000138479	3.6052	up
UNC5A	0.62709	0.761537	4.75695	5.1x10-6	0.000138635	3.60284	up
EPB41L3	0.820678	0.740854	4.74858	5.3x10-6	0.000142439	3.56919	up
NDFIP1	0.84313	3.85576	4.73918	5.5x10-6	0.000146693	3.53145	up
AP1S2	0.815503	3.63902	4.7384	5.5x10-6	0.000147078	3.5283	up
MIR373	0.981457	1.3734	4.73813	5.5x10-6	0.000147141	3.52726	up
DHRS9	1.02463	1.81854	4.73662	5.5x10-6	0.000147681	3.52119	up
CPPED1	0.623434	3.63143	4.73402	5.6x10-6	0.000148909	3.51074	up
SUCLG2	0.863682	2.64579	4.73022	5.7x10-6	0.000150599	3.49553	up
PTPRN2-AS1	0.640945	1.59612	4.7262	5.8x10-6	0.000152841	3.47942	up
LINC02978	0.981271	1.80346	4.72552	5.8x10-6	0.000152992	3.47669	up
MPV17L	0.52066	0.81239	4.72337	5.9x10-6	0.000154219	3.46808	up
HOXA-AS3	0.886679	1.14816	4.7233	5.9x10-6	0.000154219	3.46781	up
BIN2	0.501915	5.75873	4.71847	6.0x10-6	0.000156755	3.44848	up
IL12RB1	0.637784	2.29997	4.71804	6.0x10-6	0.000156933	3.44677	up
HTATIP2	0.636036	2.55513	4.71618	6.0x10-6	0.000157426	3.43933	up
ELF4	0.529258	5.10611	4.71607	6.0x10-6	0.000157426	3.43887	up
UNC13D	0.508971	4.84791	4.71367	6.1x10-6	0.000158685	3.42929	up
PIK3R5	0.603943	3.55999	4.703	6.4x10-6	0.00016348	3.38667	up
PSRC1	0.545707	1.6877	4.69958	6.5x10-6	0.000165626	3.37301	up
RIN1	0.585759	1.35929	4.69258	6.7x10-6	0.000170003	3.34509	up
LTB4R	0.600542	4.14517	4.69151	6.7x10-6	0.000170656	3.34083	up
TNFAIP8L2	0.55746	4.38367	4.68225	7.0x10-6	0.000176366	3.30399	up
MOSPD3	0.501047	2.67276	4.68011	7.0x10-6	0.000177725	3.29546	up
C4orf48	0.603483	1.84998	4.67921	7.1x10-6	0.000178195	3.29187	up
CASP1	0.775129	3.89361	4.66055	7.6x10-6	0.00018944	3.2178	up
LINC02705	0.812922	1.21273	4.65436	7.8x10-6	0.000193053	3.19327	up
HOXA-AS2	1.00111	1.41571	4.64476	8.1x10-6	0.00019931	3.15522	up
MEIS1-AS2	0.720682	0.931795	4.64412	8.2x10-6	0.000199472	3.15269	up
FCGR2C	1.13248	1.76759	4.64216	8.2x10-6	0.000200235	3.14496	up
GPAT3	0.941017	2.02418	4.62293	8.9x10-6	0.000213453	3.06904	up
VIM	0.837638	8.02444	4.6222	9.0x10-6	0.000213842	3.06617	up
ABCC3	0.537993	0.66791	4.62172	9.0x10-6	0.00021405	3.06426	up
HCK	1.0568	4.57009	4.62051	9.0x10-6	0.000214957	3.0595	up
THEMIS2	0.784577	4.60488	4.61974	9.0x10-6	0.000215387	3.05645	up
PLXNB2	0.688517	5.48792	4.61889	9.1x10-6	0.000216014	3.05311	up
FPR1	1.42602	2.6084	4.60996	9.4x10-6	0.000222805	3.01795	up
SLC26A6	0.509014	2.55595	4.60906	9.5x10-6	0.000223373	3.01439	up
HOXA2	0.613236	0.865388	4.59795	9.9x10-6	0.000231102	2.97074	up
LSP1	1.11398	4.44931	4.59695	9.9x10-6	0.000231655	2.96678	up
PSAP	0.795916	7.95193	4.58921	1.0x10-5	0.000237491	2.93642	up
PLD2	0.647864	1.47826	4.58807	1.0x10-5	0.000237971	2.93195	up
AGPAT3	0.592324	3.09664	4.58615	1.0x10-5	0.000239248	2.92442	up
CCR5	0.83828	1.58383	4.5859	1.0x10-5	0.000239351	2.92346	up
PDE4A	0.680672	1.26516	4.58173	1.0x10-5	0.000242342	2.90711	up
MCEMP1	1.0502	2.63191	4.57968	1.0x10-5	0.000243591	2.89906	up
LINC01506	0.556483	0.885008	4.56705	1.1x10-5	0.000254668	2.84966	up
S100A10	1.31868	4.91414	4.56205	1.1x10-5	0.000259059	2.83015	up
LILRA2	0.931656	3.38376	4.55644	1.1x10-5	0.0002633	2.80822	up
DENND6B	0.542857	2.31752	4.54919	1.2x10-5	0.000269412	2.77997	up
TMEM150B	0.881278	2.07418	4.54161	1.2x10-5	0.000275555	2.75043	up
ADGRE5	0.573149	6.21598	4.53649	1.2x10-5	0.000280336	2.7305	up
LINC02940	0.806407	1.44506	4.53332	1.3x10-5	0.000283517	2.7182	up
HLA-E	0.502596	7.59407	4.52804	1.3x10-5	0.000288113	2.69765	up
TRIB1	0.878262	4.26988	4.52522	1.3x10-5	0.00029097	2.68671	up
CD163	1.51659	2.25146	4.51415	1.4x10-5	0.000300776	2.64377	up
HOXB-AS3	1.21433	1.35466	4.514	1.4x10-5	0.000300798	2.64319	up
GIMAP1	0.635456	2.04585	4.51217	1.4x10-5	0.00030229	2.63608	up
TREM1	1.0278	2.76908	4.51078	1.4x10-5	0.000303715	2.63069	up
CD300LF	0.779893	4.30657	4.5057	1.4x10-5	0.000308467	2.61104	up
BCL2A1	1.01297	3.14871	4.50499	1.4x10-5	0.000309195	2.60829	up
NSMF	0.561	2.90394	4.50415	1.4x10-5	0.000309917	2.60505	up
PRDM16-DT	0.773667	0.744904	4.50291	1.4x10-5	0.000311153	2.60025	up
NKX2-3	1.15136	1.24819	4.50181	1.4x10-5	0.000312044	2.596	up
PLCB2	0.687905	5.54482	4.48755	1.5x10-5	0.000327694	2.54089	up
CTSB	0.70922	5.31028	4.47999	1.6x10-5	0.000334702	2.51175	up
STX11	0.994782	3.69492	4.47947	1.6x10-5	0.000335064	2.50972	up
PILRA	0.890756	3.63547	4.47578	1.6x10-5	0.000339458	2.49553	up
ANXA2	1.04206	3.86966	4.4665	1.7x10-5	0.000350021	2.45981	up
ATP6V0A1	0.660255	2.96954	4.46207	1.7x10-5	0.000355801	2.44277	up
PTP4A3	0.874741	2.39597	4.45853	1.7x10-5	0.000359435	2.42918	up
ARRB2	0.601376	5.31672	4.45189	1.8x10-5	0.000367848	2.40369	up
GAA	0.743174	3.91257	4.45066	1.8x10-5	0.000368289	2.39897	up
MRPL41	0.522759	3.26558	4.43944	1.9x10-5	0.00038129	2.35597	up
ZFP36	0.797459	7.03363	4.43897	1.9x10-5	0.00038129	2.35416	up
PDLIM5	0.504441	2.2537	4.43216	1.9x10-5	0.000390321	2.3281	up
CD200R1	0.594562	1.1745	4.42163	2.0x10-5	0.000402136	2.28787	up
FPR2	0.91331	1.43064	4.41767	2.0x10-5	0.000406551	2.27278	up
SIRPD	0.651284	0.967444	4.41692	2.0x10-5	0.000406768	2.26992	up
ARHGAP4	0.792632	5.40741	4.411	2.1x10-5	0.0004141	2.24735	up
SRGAP2	0.515165	2.55463	4.40542	2.1x10-5	0.000421616	2.22609	up
RAB34	0.857069	3.39436	4.40041	2.2x10-5	0.000428293	2.20701	up
IFNGR1	0.608447	5.12329	4.38602	2.3x10-5	0.000449544	2.15233	up
MX2	0.630562	2.33521	4.38319	2.3x10-5	0.000453398	2.1416	up
HLX	0.628659	2.448	4.38049	2.4x10-5	0.000457159	2.13136	up
LYN	0.542153	5.12298	4.37963	2.4x10-5	0.000458513	2.1281	up
NFAM1	1.2158	3.50473	4.37759	2.4x10-5	0.000461607	2.12036	up
TLR5	0.848511	1.44802	4.37475	2.4x10-5	0.000465525	2.10962	up
CLCN5	0.51482	1.39985	4.36967	2.5x10-5	0.000473929	2.09039	up
ADGRE1	1.05409	2.90086	4.36558	2.5x10-5	0.000480357	2.07491	up
NIBAN2	0.901633	2.60517	4.36451	2.5x10-5	0.000481722	2.07087	up
ASGR2	0.889042	1.45269	4.36154	2.6x10-5	0.000485837	2.05965	up
RNU6-917P	0.805933	1.14271	4.35319	2.6x10-5	0.000498024	2.02811	up
SLC9A7P1	0.721625	1.26934	4.34986	2.7x10-5	0.000503494	2.01554	up
CD86	1.11966	2.66912	4.34638	2.7x10-5	0.000509078	2.00242	up
VNN2	1.13472	2.55963	4.3454	2.7x10-5	0.000510588	1.99873	up
IER3	0.833457	1.73942	4.34288	2.8x10-5	0.000514777	1.98922	up
MAP3K6	0.597944	2.12438	4.33859	2.8x10-5	0.000521433	1.97308	up
CALHM2	0.608799	3.1389	4.33419	2.8x10-5	0.000528809	1.95653	up
KIF16B	0.573876	1.76813	4.33312	2.9x10-5	0.00053017	1.95251	up
GRN	0.934613	6.8235	4.33046	2.9x10-5	0.000534148	1.94251	up
APOBEC3A	1.07767	2.01647	4.32919	2.9x10-5	0.000536026	1.93773	up
TRABD	0.525016	4.85687	4.3261	2.9x10-5	0.000541352	1.92612	up
AIFM3	0.597307	1.54869	4.31728	3.1x10-5	0.000557591	1.893	up
LGALS3	1.01956	3.08998	4.30819	3.2x10-5	0.000574919	1.85893	up
ABCA7	0.656742	3.75174	4.29993	3.3x10-5	0.000589917	1.82804	up
HSPA1A	0.529523	3.46088	4.2952	3.3x10-5	0.000598613	1.81035	up
CCNG1P1	0.602306	0.795042	4.29435	3.3x10-5	0.000600349	1.80719	up
SPRED2	0.634071	2.04088	4.29387	3.4x10-5	0.000601214	1.8054	up
HOXB7	0.636549	0.644348	4.29164	3.4x10-5	0.000605448	1.79706	up
IFNGR2	0.526403	4.43004	4.28342	3.5x10-5	0.000622312	1.76641	up
SAMHD1	1.20803	5.55736	4.28017	3.5x10-5	0.000629493	1.75429	up
H2AJ	0.644036	1.97018	4.27877	3.6x10-5	0.000632703	1.74906	up
S100A9	2.08779	7.80938	4.27399	3.6x10-5	0.000642998	1.73126	up
EGR2	0.861862	1.467	4.27344	3.6x10-5	0.000644114	1.7292	up
PLBD1	1.47779	2.76036	4.27234	3.7x10-5	0.000645908	1.72512	up
TCN2	0.952161	2.6654	4.27228	3.7x10-5	0.000645908	1.72489	up
CORO1A	0.563782	6.41204	4.26415	3.8x10-5	0.000662764	1.69467	up
MARCO	0.922821	1.10937	4.25656	3.9x10-5	0.000678328	1.66649	up
CD93	1.17198	3.70533	4.25036	4.0x10-5	0.00069171	1.64348	up
TLDC2	0.846114	2.43944	4.25012	4.0x10-5	0.000692045	1.6426	up
CREB5	0.652947	1.3427	4.23883	4.2x10-5	0.00071803	1.60079	up
RAB31	1.06463	3.13083	4.22689	4.4x10-5	0.000744872	1.55668	up
RPL7AP64	0.774807	0.999749	4.22393	4.4x10-5	0.000752292	1.54576	up
LRG1	0.778508	2.12257	4.21327	4.6x10-5	0.000779546	1.50646	up
SIGLEC10	0.723943	2.90016	4.19892	4.9x10-5	0.000812282	1.45371	up
VENTX	0.92417	1.34245	4.19496	5.0x10-5	0.000822672	1.43916	up
CPM	0.783538	1.31213	4.19097	5.0x10-5	0.000832888	1.42453	up
SORBS3	0.664323	2.31027	4.18862	5.1x10-5	0.000838793	1.41589	up
RASSF4	0.880848	2.81946	4.1857	5.1x10-5	0.000846084	1.4052	up
CXCL16	0.86276	1.80151	4.17936	5.3x10-5	0.000861613	1.38196	up
MIR4518	0.702858	2.62044	4.17605	5.3x10-5	0.000869599	1.36987	up
ITPRIPL2	0.537547	2.28781	4.17316	5.4x10-5	0.000877861	1.35929	up
C2	0.69203	0.854257	4.17043	5.5x10-5	0.000885006	1.34932	up
TLR4	1.00926	3.47607	4.16609	5.5x10-5	0.000897058	1.33348	up
SEL1L3	0.77403	3.33252	4.1639	5.6x10-5	0.000902842	1.32549	up
PXN	0.546998	3.95298	4.16203	5.6x10-5	0.000907449	1.31867	up
KCTD12	1.33429	3.3779	4.16107	5.7x10-5	0.000909085	1.31516	up
UGGT2	0.646943	0.906652	4.15628	5.8x10-5	0.000920883	1.29767	up
RBM47	1.05789	2.30429	4.15311	5.8x10-5	0.000928088	1.28614	up
HOXB-AS2	1.34765	2.26293	4.15067	5.9x10-5	0.000935193	1.27724	up
HPSE	0.710089	1.81216	4.1451	6.0x10-5	0.000950765	1.25697	up
LINC01475	1.11699	1.36979	4.12662	6.5x10-5	0.00101039	1.18989	up
ADGRE3	0.733162	1.10153	4.12453	6.5x10-5	0.00101626	1.1823	up
BAG3	0.601058	1.08969	4.12169	6.6x10-5	0.00102515	1.17202	up
NOD2	0.847095	2.18729	4.11034	6.9x10-5	0.00106426	1.13097	up
ST14	0.853047	1.70503	4.10905	6.9x10-5	0.00106785	1.1263	up
LGALS2	1.28752	2.06411	4.10837	6.9x10-5	0.00107021	1.12385	up
SMPDL3A	0.682644	0.811175	4.10575	7.0x10-5	0.00107931	1.11441	up
FAM157C	0.501198	0.973056	4.1038	7.1x10-5	0.00108699	1.10735	up
OASL	0.50968	0.974459	4.09412	7.3x10-5	0.00112059	1.07247	up
THBS1	1.17805	2.11368	4.09275	7.4x10-5	0.00112521	1.0675	up
MIR23AHG	0.812862	4.62542	4.08971	7.5x10-5	0.00113439	1.05658	up
MYO1G	0.537314	4.8398	4.08243	7.7x10-5	0.00116058	1.03039	up
MS4A6A	1.38326	3.53034	4.08017	7.7x10-5	0.00116706	1.02227	up
PHACTR3	0.531091	0.401966	4.07076	8.0x10-5	0.00120371	0.988494	up
MIR7152	0.714618	1.45531	4.06644	8.2x10-5	0.00122043	0.973004	up
TP53I11	0.708217	2.48477	4.0542	8.5x10-5	0.00126566	0.929178	up
FGL2	1.27758	4.00571	4.04686	8.8x10-5	0.00129369	0.902942	up
MICAL1	0.634764	4.61434	4.04092	9.0x10-5	0.00131529	0.881771	up
RNASE6	1.27078	4.56082	4.03878	9.1x10-5	0.00132213	0.874113	up
CCR5AS	0.525792	1.08652	4.02802	9.4x10-5	0.0013685	0.83579	up
MS4A14	0.909977	2.09113	4.01269	0.000100517	0.0014348	0.781345	up
HVCN1	0.630299	3.05412	4.00343	0.000104085	0.00147187	0.748534	up
S100A8	1.8829	6.36646	4.00033	0.000105305	0.00148859	0.737572	up
FAM20C	0.712344	1.5816	3.99884	0.000105897	0.00149535	0.732301	up
NOXA1	0.711287	2.17385	3.99367	0.000107976	0.00151854	0.71402	up
IL10	0.529922	0.567959	3.98465	0.000111697	0.00156333	0.682166	up
ZNF532	0.576872	0.87315	3.98389	0.000112015	0.00156603	0.679491	up
WDR49	0.804512	2.02098	3.96176	0.000121695	0.00167346	0.601588	up
IL4R	0.517458	3.47127	3.95361	0.000125457	0.00171561	0.572989	up
SLC2A6	0.661899	2.08395	3.95175	0.00012633	0.00172575	0.566474	up
C3AR1	0.914823	3.92405	3.94946	0.000127412	0.00173452	0.558461	up
MS4A4A	0.994178	2.03938	3.94809	0.000128067	0.00174013	0.553644	up
CXCR2P1	0.797274	1.31401	3.94059	0.000131697	0.00177568	0.527393	up
PDK4	0.831802	1.31885	3.93439	0.000134768	0.00180946	0.505744	up
ISG15	0.613303	2.93082	3.93427	0.000134828	0.00180946	0.505328	up
NCF4	0.519168	5.70988	3.92847	0.000137767	0.00184114	0.485084	up
ODF3B	0.769413	2.70293	3.92301	0.000140589	0.00186935	0.466045	up
MICAL2	0.566702	1.85844	3.92097	0.00014166	0.00188058	0.458926	up
LINC01637	0.667142	2.38084	3.91817	0.000143141	0.00189561	0.449161	up
GIMAP8	0.828882	2.13047	3.91544	0.000144594	0.00190908	0.43968	up
CSTA	1.16186	3.98336	3.91498	0.000144844	0.00190917	0.438063	up
ARHGAP22	0.655123	1.58949	3.90659	0.000149414	0.00195309	0.408908	up
SAT1	0.746479	6.29127	3.89593	0.000155423	0.00201692	0.371916	up
SAGE1	0.718765	0.511501	3.89503	0.000155938	0.00202227	0.36881	up
CTSL	0.836033	1.9647	3.89326	0.000156965	0.00203425	0.362655	up
TRPM4	0.521601	0.626513	3.88676	0.000160777	0.00207818	0.34015	up
FGD4	0.746405	1.94604	3.88284	0.000163115	0.00210151	0.326608	up
AP1S3	0.543472	1.57647	3.88058	0.000164477	0.00211629	0.318813	up
RTL8A	0.798736	2.68518	3.87727	0.000166496	0.002136	0.30737	up
ST8SIA6	1.01608	2.28488	3.86844	0.000171993	0.00218376	0.276918	up
LDLRAD3	0.915534	1.59579	3.86772	0.000172451	0.00218719	0.274424	up
CAST	0.578171	3.54456	3.85636	0.0001798	0.00226682	0.23531	up
MIR3690	0.729936	2.93467	3.85551	0.000180359	0.00227176	0.232399	up
SLA	0.631352	3.6318	3.85462	0.000180948	0.0022762	0.229345	up
GIMAP4	0.973021	3.07689	3.84812	0.000185309	0.00231719	0.20703	up
TLR7	0.839417	1.50654	3.84798	0.000185403	0.00231745	0.206554	up
MARCKS	0.890256	2.45094	3.84505	0.000187405	0.0023379	0.196489	up
PRDM16	0.804036	0.976069	3.83691	0.000193071	0.00239596	0.168588	up
COL9A2	0.700879	2.21963	3.82948	0.000198387	0.00244638	0.143148	up
HCST	0.646954	5.15983	3.82929	0.00019852	0.00244649	0.142522	up
SERPINI2	0.735851	1.74835	3.82365	0.000202646	0.00248689	0.12326	up
FCGR3A	1.07262	2.83272	3.82328	0.000202921	0.00248828	0.121987	up
CTSS	0.88758	6.00793	3.82	0.000205365	0.00251434	0.110779	up
ADGRA2	0.793708	2.46219	3.8144	0.000209598	0.00255505	0.0916786	up
MYADM-AS1	0.5038	2.47526	3.81246	0.00021108	0.00257073	0.0850814	up
SLC8A1	0.519457	0.751359	3.80836	0.000214254	0.00260408	0.0711132	up
VNN3P	0.577024	0.849714	3.80559	0.000216419	0.00262683	0.061702	up
DUSP6	0.863417	4.76064	3.80225	0.000219068	0.00265046	0.0503194	up
DTX4	0.634112	1.60195	3.7979	0.000222556	0.00268313	0.035536	up
APOA2	0.569817	1.28184	3.79069	0.000228449	0.00274077	0.0110825	up
PSTPIP1	0.616756	3.45088	3.78429	0.000233808	0.00279146	-0.0106054	up
ARHGEF11	0.781676	2.41553	3.77668	0.000240339	0.00285044	-0.0363735	up
CAMK1D	0.660562	2.68592	3.77058	0.000245697	0.00289915	-0.0569895	up
NLRP3	0.632748	3.57985	3.76941	0.000246738	0.00290733	-0.0609419	up
RIPOR2	0.561577	4.64439	3.76909	0.000247018	0.00290938	-0.0620028	up
SERPINB2	0.950781	1.76733	3.76614	0.000249667	0.0029337	-0.0719758	up
C20orf27	0.528649	4.05515	3.76029	0.000254988	0.00298032	-0.0916898	up
TP53INP2	0.939708	2.86844	3.7541	0.000260735	0.00303523	-0.112521	up
CRISPLD2	0.677503	1.34515	3.75406	0.000260772	0.00303523	-0.112654	up
LINC00211	0.534449	0.954926	3.74338	0.000270989	0.00313103	-0.148567	up
CDC42EP1	0.624086	1.00615	3.74257	0.000271779	0.00313832	-0.151286	up
TIMP1	0.740383	5.71929	3.74182	0.000272512	0.0031431	-0.153803	up
MSR1	0.606412	0.650842	3.74088	0.000273437	0.00315192	-0.156969	up
SLC24A4	0.66497	1.64813	3.73303	0.000281248	0.00322029	-0.183282	up
CACNA2D4	0.741533	2.40745	3.72779	0.000286578	0.00326898	-0.200814	up
ZNF467	0.684553	3.25017	3.72033	0.000294338	0.00333433	-0.225763	up
MS4A7	0.917285	3.34426	3.71916	0.000295576	0.00334548	-0.229684	up
RELT	0.503117	3.66583	3.71084	0.00030449	0.00341639	-0.257422	up
DYSF	0.841477	3.12306	3.71081	0.000304528	0.00341639	-0.257538	up
TPPP3	0.762896	1.30625	3.70381	0.000312227	0.00347506	-0.280841	up
LINC02981	0.502947	1.16029	3.70187	0.000314402	0.00349828	-0.28732	up
SDC4	0.595521	1.65629	3.6939	0.000323457	0.00358184	-0.313814	up
CTSH	0.640934	3.07821	3.69244	0.000325137	0.00359338	-0.318648	up
ARSA	0.523505	3.52951	3.69226	0.000325345	0.00359383	-0.319244	up
PRKAR2B	0.801981	3.09319	3.68528	0.000333522	0.00366856	-0.342401	up
JUNB	0.66176	6.90119	3.68263	0.000336676	0.00369542	-0.351179	up
RTL8C	0.917506	2.87117	3.68163	0.000337876	0.00370404	-0.354496	up
CXCR2	0.583682	1.55278	3.67495	0.000345987	0.00377616	-0.376621	up
CCL5	0.68476	4.41438	3.67253	0.000348963	0.00379917	-0.384607	up
CLEC4A	0.856608	2.44444	3.67148	0.00035027	0.00381023	-0.388091	up
ANXA2P2	0.598839	1.71555	3.669	0.000353362	0.00383269	-0.396285	up
MIR23A	0.797983	4.18219	3.64985	0.000378125	0.00403012	-0.459416	up
SIGLEC1	0.819863	1.12566	3.64895	0.000379326	0.00404044	-0.462372	up
PAK1	0.532767	4.11242	3.63059	0.000404672	0.00423825	-0.522622	up
RNA5SP498	0.934888	3.36532	3.6285	0.000407657	0.00426384	-0.529464	up
STS	0.55589	1.84193	3.62643	0.000410646	0.00429055	-0.536267	up
SGSH	0.641709	1.86409	3.62055	0.00041921	0.00435775	-0.555485	up
S100A12	1.59506	4.06864	3.61149	0.000432746	0.00446231	-0.585066	up
LRP1	1.12062	2.80642	3.61025	0.000434632	0.00447562	-0.589113	up
HSPE1P18	0.797466	1.80328	3.60292	0.00044592	0.00457184	-0.612973	up
LINC02384	0.512669	1.36749	3.5921	0.000463113	0.004715	-0.648168	up
TMEM273	0.753053	1.49455	3.59045	0.00046579	0.00473369	-0.653528	up
LGALS9	0.54218	4.69637	3.58084	0.000481656	0.00486257	-0.684678	up
RNU6-1003P	0.60483	0.887215	3.57989	0.000483256	0.00486975	-0.687761	up
RNA5SP154	0.547523	1.12198	3.57976	0.00048347	0.00487066	-0.688173	up
MTMR11	0.796329	1.29182	3.57576	0.000490239	0.00492377	-0.701101	up
UPP1	0.672037	2.23146	3.56389	0.000510903	0.00508722	-0.739476	up
AHNAK	0.607761	6.36097	3.5623	0.000513727	0.0051032	-0.744599	up
TBC1D9	0.593823	1.56013	3.56041	0.000517095	0.00512814	-0.750671	up
SYTL4	0.563601	0.887234	3.55699	0.000523264	0.0051724	-0.76169	up
CAMK1	0.500807	1.34978	3.54962	0.000536794	0.00527571	-0.785406	up
ACP3	0.632323	2.16162	3.53891	0.00055706	0.00541413	-0.819824	up
FCAR	0.958358	2.5222	3.52879	0.000576845	0.00555945	-0.852227	up
AKR1B1	0.50918	3.04327	3.52141	0.000591705	0.00566837	-0.875834	up
MIR7848	0.62663	3.05749	3.5183	0.000598071	0.0057127	-0.885766	up
SCPEP1	0.904318	3.89801	3.51399	0.000606998	0.00577697	-0.899513	up
TNNT1	0.610005	0.872218	3.51311	0.000608845	0.00578895	-0.902332	up
BCL6	0.796067	3.14967	3.51145	0.000612329	0.00581786	-0.907625	up
ALDH3B1	0.543492	3.71906	3.51092	0.00061343	0.00582692	-0.909292	up
CDK18	0.510219	1.67461	3.50883	0.000617855	0.00586038	-0.91596	up
ADGRB1	0.529404	1.28018	3.50822	0.000619159	0.00587002	-0.917915	up
FCER2	0.777409	2.08827	3.50522	0.00062556	0.00591789	-0.927456	up
IL10RA	0.780687	3.47477	3.49772	0.000641842	0.00604291	-0.951287	up
IGSF6	0.710303	3.2372	3.49506	0.000647733	0.0060766	-0.959759	up
TNFSF9	0.54417	1.33871	3.49487	0.000648136	0.00607785	-0.960335	up
P2RY13	0.863751	2.77492	3.49251	0.000653402	0.00611417	-0.967838	up
IQSEC1	0.530313	3.59294	3.48741	0.000664898	0.00620073	-0.984007	up
PRR7	0.515952	2.21169	3.48081	0.000680054	0.00630923	-1.0049	up
ZNF703	0.500595	0.922271	3.47269	0.000699157	0.00645455	-1.03057	up
RHOB	0.807729	4.89937	3.47213	0.000700496	0.0064654	-1.03234	up
SULF2	0.828329	2.66223	3.46824	0.000709844	0.00653331	-1.04462	up
FCN1	1.30755	4.24683	3.46508	0.000717529	0.00659174	-1.0546	up
SPINT1	0.662344	2.30527	3.46407	0.000719992	0.0066082	-1.05777	up
METRNL	0.592827	2.63349	3.45531	0.000741749	0.00676378	-1.08535	up
TLR6	0.537434	2.45366	3.43677	0.000789864	0.00710878	-1.14353	up
DUSP1	0.644759	7.53252	3.43345	0.000798767	0.00717089	-1.1539	up
PELI1	0.616373	3.20778	3.43058	0.000806567	0.00722118	-1.16289	up
CPVL	0.937719	3.18647	3.42176	0.000830944	0.00740075	-1.19043	up
PLP2	0.503895	6.8496	3.41936	0.000837677	0.00744054	-1.1979	up
PF4	1.10801	2.31074	3.41775	0.00084226	0.00747451	-1.20294	up
RCN3	0.567538	1.89946	3.40811	0.000870039	0.00765211	-1.23294	up
SNX10-AS1	0.584296	1.18098	3.40718	0.00087276	0.00767223	-1.23583	up
NLRP1	0.602039	3.61017	3.40124	0.000890337	0.00779584	-1.25426	up
LINC02723	0.5563	0.929485	3.3951	0.000908881	0.00794227	-1.27331	up
SLC9A9	0.518862	1.35023	3.39494	0.000909385	0.00794321	-1.27382	up
OR52K3P	0.809551	1.74229	3.39297	0.000915401	0.00798128	-1.27992	up
IGF2BP2	0.604275	4.79481	3.39195	0.00091853	0.00799651	-1.28307	up
TSC22D3	0.566309	6.07852	3.38981	0.000925142	0.00804164	-1.2897	up
RGS10	0.622082	3.95623	3.37782	0.000963024	0.00827419	-1.32676	up
ECE1	0.566069	2.22994	3.36501	0.00100508	0.00856085	-1.36622	up
PRPF38AP2	0.6965	1.35639	3.34921	0.00105933	0.0088972	-1.41473	up
HLA-F	0.548463	3.08245	3.34397	0.00107789	0.00901355	-1.43076	up
P2RX7	0.543274	2.99685	3.34134	0.00108737	0.00907661	-1.43883	up
HOXB9	0.598023	0.490958	3.33673	0.0011041	0.0091801	-1.45291	up
CAPG	0.76263	4.69092	3.31731	0.00117728	0.00969249	-1.51206	up
CDKN1A	0.726992	3.60242	3.3172	0.00117771	0.00969397	-1.5124	up
MS4A4E	0.993714	3.64171	3.31371	0.00119135	0.0097863	-1.52301	up
OSCAR	0.854477	3.97339	3.30936	0.00120856	0.00988713	-1.53622	up
MIR27A	0.698017	3.25038	3.30907	0.00120971	0.00989125	-1.53709	up
SERPINA1	1.14539	4.08795	3.30886	0.00121055	0.00989454	-1.53773	up
AP5B1	0.538735	4.22971	3.30217	0.00123749	0.0100516	-1.558	up
NOTCH2	0.506424	4.25569	3.29894	0.00125069	0.0101401	-1.56777	up
CAVIN2	0.820785	2.11619	3.29812	0.00125406	0.0101632	-1.57025	up
MARVELD1	0.590818	4.04628	3.29485	0.0012676	0.0102488	-1.58014	up
SGK1	0.634439	1.75366	3.28253	0.00131987	0.0105942	-1.61732	up
MTSS1	0.660015	2.7696	3.27479	0.00135368	0.0108062	-1.6406	up
BST1	0.63297	3.4264	3.27357	0.00135912	0.0108386	-1.64428	up
LY96	0.723056	2.63138	3.26776	0.00138513	0.0109965	-1.66172	up
AQP9	0.866296	1.75266	3.26771	0.00138535	0.0109965	-1.66186	up
RNU6-37P	0.538385	1.66611	3.26627	0.00139188	0.0110373	-1.66619	up
RIN2	0.521083	1.50671	3.26263	0.0014085	0.0111355	-1.6771	up
NR4A1	0.71338	2.24981	3.24518	0.0014908	0.0116464	-1.72929	up
MACROH2A2	0.769142	1.72634	3.24335	0.00149968	0.0116968	-1.73475	up
IFI6	0.660054	4.44978	3.23888	0.00152158	0.0118278	-1.74807	up
CSF1R	0.761148	4.86076	3.23747	0.00152854	0.011868	-1.75226	up
ST8SIA6-AS1	0.667236	1.40544	3.2348	0.00154183	0.011941	-1.76021	up
PLAUR	0.626506	3.41873	3.22298	0.00160197	0.0123143	-1.79534	up
THBS1-IT1	0.503205	0.550043	3.21484	0.00164458	0.0125905	-1.81943	up
RNU6ATAC39P	0.549408	1.89121	3.21027	0.001669	0.0127401	-1.83296	up
PDCD6IPP1	0.799105	1.16339	3.20819	0.00168022	0.0128034	-1.8391	up
GZMH	0.596977	1.92778	3.20649	0.00168946	0.0128564	-1.84414	up
CYP27A1	0.700904	1.20465	3.19052	0.0017784	0.0133655	-1.89118	up
THBS1-AS1	0.528873	0.700573	3.15107	0.00201718	0.0147988	-2.00657	up
LYZ	1.32202	9.45969	3.13924	0.00209444	0.0152267	-2.04096	up
PTX3	0.510868	1.80902	3.13737	0.00210684	0.0153084	-2.04636	up
VCAN	1.3589	4.01986	3.13462	0.00212532	0.0154151	-2.05435	up
LY86	0.994809	3.69948	3.12887	0.00216432	0.0156396	-2.07097	up
CD101	0.61973	1.6218	3.12424	0.00219623	0.0158132	-2.08435	up
NLRC4	0.588515	2.13439	3.12195	0.00221221	0.0159069	-2.09098	up
TNFSF10	0.632879	3.36078	3.12128	0.00221686	0.0159287	-2.0929	up
PECAM1	0.612179	5.06344	3.11704	0.00224672	0.0160787	-2.10512	up
RPL7P18	0.504016	2.39544	3.11153	0.00228614	0.0162957	-2.12101	up
SIGLEC22P	0.60312	2.96995	3.11025	0.00229532	0.0163434	-2.12467	up
IFITM3	0.989844	4.27043	3.10497	0.00233378	0.0165426	-2.13985	up
SCUBE1	0.636591	1.14918	3.10452	0.00233711	0.0165572	-2.14115	up
CYP1B1	0.673604	1.48336	3.09219	0.00242941	0.0170682	-2.17651	up
FCGRT	0.667656	4.09943	3.09204	0.00243052	0.0170717	-2.17693	up
HLA-DMA	0.677508	5.44711	3.07625	0.00255368	0.0177439	-2.22203	up
ROBO3	0.538497	1.77468	3.06181	0.00267141	0.0183516	-2.26312	up
C1QA	0.971624	2.10386	3.0609	0.00267897	0.0183907	-2.2657	up
TRIM46	0.511855	2.27116	3.05763	0.00270637	0.0185207	-2.27497	up
PADI4	0.672761	3.53716	3.05097	0.00276302	0.0188169	-2.29385	up
VSIG4	0.878238	2.23843	3.03974	0.00286089	0.0193264	-2.32555	up
PLD4	0.731333	2.88338	3.03597	0.00289453	0.0194936	-2.33619	up
IRF8	0.911901	3.7239	3.03353	0.00291642	0.0196231	-2.34305	up
BLVRB	0.583219	4.30298	3.03281	0.00292295	0.0196434	-2.34509	up
PPBP	1.14039	3.18727	3.02986	0.00294974	0.0197876	-2.35339	up
FCGR2A	0.717827	3.14576	3.02818	0.0029651	0.0198805	-2.35812	up
RNASE2CP	0.887805	4.93299	3.02801	0.00296661	0.0198872	-2.35858	up
MIR6503	0.875006	2.94478	3.02728	0.00297332	0.019922	-2.36063	up
CARD9	0.501315	3.01905	3.0255	0.00298971	0.0200081	-2.36564	up
ADCY7	0.505316	3.70602	3.02294	0.00301349	0.0201296	-2.37284	up
NPL	0.577197	1.89982	3.01062	0.00313002	0.0207218	-2.40735	up
ADGRE4P	0.655128	1.50562	3.00887	0.00314698	0.0207998	-2.41226	up
MIR4802	0.824542	2.1785	2.99659	0.00326784	0.0214159	-2.44652	up
SIGLEC14	0.641926	3.42855	2.99375	0.00329639	0.0215375	-2.45442	up
LY6E	0.546282	5.04708	2.98854	0.00334943	0.0218189	-2.46892	up
EPB41L2	0.609051	2.23331	2.96666	0.00358075	0.0230101	-2.52954	up
SLC9A3R2	0.510539	1.92515	2.94564	0.00381681	0.0242307	-2.58742	up
GASK1B	0.733	2.13081	2.94522	0.00382165	0.0242536	-2.58857	up
C11orf21	0.557515	4.52828	2.93999	0.00388253	0.024557	-2.6029	up
ARAP3	0.518898	1.87538	2.93614	0.00392804	0.0247614	-2.61345	up
IL13RA1	0.697394	3.49215	2.90681	0.00429065	0.0265921	-2.69337	up
EHD2	0.7242	1.91044	2.90492	0.00431502	0.0267137	-2.69849	up
MEGF9	0.575569	3.8217	2.90112	0.00436442	0.0269729	-2.70879	up
IRS2	0.554214	3.79252	2.90049	0.00437268	0.0270155	-2.71049	up
PTMS	0.651821	3.42866	2.87916	0.00466036	0.0282829	-2.76807	up
EIF4E3	0.528391	2.92375	2.87775	0.00467992	0.0283536	-2.77185	up
CD74	0.738149	8.95675	2.86739	0.00482636	0.02904	-2.79967	up
HLA-DRB1	0.829974	6.91833	2.85286	0.0050388	0.0299518	-2.83852	up
OAS2	0.586373	3.32111	2.85233	0.00504675	0.029977	-2.83995	up
TSPAN32	0.599013	4.67618	2.83749	0.00527292	0.0310351	-2.87946	up
HOXB8	0.512074	0.486802	2.82846	0.005415	0.0316315	-2.90341	up
NAMPT	0.605724	3.26658	2.82163	0.00552475	0.0321452	-2.92148	up
CLEC2B	0.56871	3.74865	2.81429	0.00564491	0.0326578	-2.94084	up
CD36	0.827766	3.60946	2.80709	0.00576516	0.0331985	-2.9598	up
ADAMTSL4	0.515433	3.64381	2.80174	0.00585601	0.0335843	-2.97386	up
MX1	0.599267	1.97339	2.79869	0.0059085	0.0338115	-2.98188	up
LRRK2	0.623221	1.56804	2.79317	0.00600432	0.034184	-2.99634	up
DPYSL2	0.646347	3.21472	2.78381	0.00617015	0.0349184	-3.02082	up
RXFP2	0.682662	1.84539	2.77806	0.00627406	0.0353643	-3.03582	up
RNASE1	0.544277	1.37602	2.76234	0.00656641	0.0366354	-3.07669	up
PTPRJ	0.566858	3.06777	2.76234	0.00656651	0.0366354	-3.07671	up
SKAP2	0.59679	4.17427	2.73235	0.00715886	0.0392076	-3.15411	up
MMP17	0.527046	1.71623	2.73168	0.00717261	0.0392338	-3.15583	up
CSF2RB	0.52871	4.14127	2.73134	0.00717965	0.0392555	-3.15671	up
RHOU	0.504757	2.23505	2.71089	0.00761192	0.0411626	-3.20902	up
PADI2	0.587173	1.8856	2.70501	0.0077407	0.0417331	-3.22402	up
HSPB1	0.505186	4.26545	2.70025	0.00784628	0.0421524	-3.23613	up
IGHJ2P	0.926207	2.22759	2.69224	0.00802691	0.0429122	-3.25646	up
SERPINB6	0.5639	4.22901	2.6897	0.00808485	0.0431576	-3.26288	up
GZMB	0.504072	1.76858	2.6768	0.00838569	0.0444205	-3.29549	up
CR1	0.594129	1.72432	2.67598	0.00840495	0.0445105	-3.29754	up
MRC1	0.694089	1.56048	2.67519	0.00842377	0.0445862	-3.29954	up
IL17RA	0.57431	4.72139	2.66718	0.00861636	0.0454226	-3.3197	up
RPL7AP75	0.523674	1.31972	2.6641	0.00869161	0.0457275	-3.32745	up
DPYSL3	0.521922	1.13094	2.66206	0.00874153	0.0458982	-3.33256	up
ACSL1	0.548356	4.07833	2.65515	0.0089131	0.0466314	-3.34988	up
DOCK1	0.652844	1.48974	2.6547	0.00892451	0.0466663	-3.35102	up
RAB27B	0.595187	2.19365	2.62377	0.00973103	0.0498592	-3.42802	up
ADA2	0.598232	5.21861	2.61745	0.00990367	0.0505522	-3.44365	up
RNU6ATAC6P	1.02672	2.87212	2.57613	0.0111027	0.0552786	-3.54508	up
RGS2	0.747083	4.24947	2.57512	0.0111333	0.055366	-3.54752	up
SIGLEC12	0.597601	2.12691	2.56481	0.0114529	0.0564989	-3.57258	up
OLFML2A	0.550982	1.25722	2.56212	0.0115378	0.0568184	-3.57912	up
CLEC10A	0.657903	1.33548	2.56078	0.0115802	0.0569912	-3.58237	up
HLA-DRB5	0.813255	5.5452	2.52654	0.0127122	0.0611648	-3.66482	up
SRGN	0.668996	9.85363	2.51912	0.0129705	0.061984	-3.68258	up
HTR1F	0.604632	1.46504	2.51593	0.0130827	0.0624291	-3.69018	up
NHSL2	0.523339	2.4922	2.50704	0.0134006	0.063546	-3.71136	up
RNASE2	0.815489	7.72569	2.49596	0.0138063	0.064883	-3.73764	up
DACH1	0.596306	2.0544	2.49441	0.0138638	0.0650631	-3.7413	up
CCR2	0.776929	2.76154	2.49266	0.0139291	0.0653056	-3.74544	up
IL2RA	0.577953	1.43495	2.48986	0.0140345	0.0656749	-3.75208	up
HLA-DPB1	0.702313	5.58532	2.481	0.0143715	0.0668708	-3.77297	up
CKAP4	0.567927	2.56997	2.47807	0.0144848	0.0672945	-3.77987	up
TRPS1	0.512596	1.83127	2.4554	0.0153865	0.0703235	-3.83296	up
GABBR1	0.599041	2.29966	2.45261	0.0155013	0.0707369	-3.83948	up
HLA-DQB1	0.747687	3.95712	2.44093	0.0159885	0.0723616	-3.86664	up
MIR3619	0.531002	2.39846	2.43695	0.0161574	0.0729835	-3.87585	up
GPR27	0.637567	2.67993	2.42818	0.0165357	0.0743767	-3.89614	up
CD180	0.593316	3.36313	2.40671	0.0174951	0.0774891	-3.94551	up
HLA-DRB6	0.715627	3.53399	2.39558	0.0180116	0.0791456	-3.97095	up
HLA-DRA	0.719133	8.66009	2.3911	0.0182235	0.0797831	-3.98117	up
EREG	0.837221	2.05447	2.38819	0.018362	0.0801577	-3.98778	up
IL1R2	0.555267	0.825933	2.36977	0.019262	0.0830027	-4.02954	up
CYBB	0.842861	5.29129	2.34787	0.020382	0.0866812	-4.07877	up
ZFP36L1	0.509207	3.63819	2.34352	0.0206115	0.0874118	-4.08851	up
C3orf80	0.771837	2.46072	2.33614	0.0210055	0.0887582	-4.10498	up
ITGB3	0.507585	1.17608	2.3344	0.0210992	0.0890431	-4.10885	up
HLA-DPA1	0.693853	4.99023	2.31454	0.0221973	0.0925907	-4.15291	up
MIR6774	0.642828	2.60743	2.29826	0.0231349	0.0954632	-4.18878	up
UICLM	0.728807	1.62051	2.28328	0.024028	0.0981841	-4.22157	up
ADGRG1	0.594561	2.86906	2.25944	0.0255116	0.10277	-4.27335	up
ITGA2B	0.521001	2.41436	2.25828	0.0255859	0.102982	-4.27586	up
VCAN-AS1	0.595997	1.39225	2.23043	0.0274245	0.108615	-4.33568	up
AHR	0.53503	4.21675	2.21237	0.0286779	0.112192	-4.37411	up
GNLY	0.5018	2.61898	2.21097	0.0287768	0.112501	-4.37707	up
ALOX5	0.615734	4.03445	2.20263	0.0293741	0.114179	-4.39471	up
GIMAP7	0.518434	3.00148	2.19358	0.0300338	0.116091	-4.41377	up
DEFB1	0.692086	1.57341	2.15884	0.0326896	0.123926	-4.4863	up
RXFP1	0.511213	1.19695	2.0586	0.0415196	0.14791	-4.68949	up
SLC22A15	0.549351	2.42829	2.01404	0.046058	0.159363	-4.77691	up
BEX3	0.621778	2.95436	2.0055	0.0469744	0.16163	-4.79346	up
